# Supplementary material
Source: PubMed Central journal article supplement (PMC3192915)
Supplement: NIHMS321284-supplement-Supp_Figure_S1-S5_Table_S1-S3.pdf [file NIHMS321284-supplement-Supp_Figure_S1-S5_Table_S1-S3.pdf]

**Supplementary Online Material**  
for

**“Knockout of G protein  $\beta$ 5 impairs brain development and causes multiple  
neurologic abnormalities in mice”**

by Zhang *et al*

**Contents:**

- 1. Supplementary Materials and Methods**
- 2. References for Supplementary Methods**
- 3. Legends to Supplementary Figures**
- 4. Supplementary Figures S1 to S5**
- 5. Supplementary Tables 1 to 3**

**1. Supplementary Materials and Methods**

**Mouse genotyping**

Mouse genotyping was performed by QPCR analysis of genomic DNA extracted from mouse tails using the DirectPCR (tail) solution (Viagen, Cat# 102-T) according to manufacturer's instructions. The G $\beta$ 5 knock-out allele was identified employing the primer pair, Fwd: 5'-GCC ACC AGA AGT CAG CAG AAG AGG-3', and Rev: 5'-GCA GCG CAT CGC CTT CTA TC-3'. The wild type G $\beta$ 5 allele was identified employing the same forward primer as above with the reverse primer 5'-GTA ACT TTG AGG TCA CTC ACA GCA T-3'. PCR conditions used were 95°C for 10 min followed by 40 cycles of 95°C 30 sec, 57°C for 1 min and 72°C for 1 min. The specificity of the PCR

products was evaluated by one cycle of dissociation curve analysis (95°C for 1 min, 55°C for 30 sec and 95°C for 30 sec).

Mice hemizygous for a transgene expressing Enhanced Green Fluorescent Protein (EGFP) under the direction of the mouse Purkinje cell protein 2 promoter (strain B6; FVB-Tg(Pcp2-EGFP)2Yuza/J; stock no. 004690) were obtained from The Jackson Laboratory (Bar Harbor, ME). The Pcp2-EGFP allele was identified by PCR genotyping employing the primers: Fwd: 5'-AAG TTC ATC TGC ACC ACC G-3', and Rev: 5'-TCC TTG AAG AAG ATG GTG CG-3'.

### **Motor coordination and activity testing**

Testing on the accelerating rotarod (Model No 7650; Ugo Basile, Varese, Italy) was according to the protocol of Le Marec and Lalonde (Le Marec & Lalonde 1997). Briefly, after habituation in the test room for an hour, mice were acclimatized to balance on the rotarod for 10 min. During each session mice were placed on the rotarod accelerating from 4 to 40 rpm over 5 minutes. Time spent by mice on the rotarod was observed until the mice dropped slowly from the rod to the platform. Mice received 3 trials per day for five consecutive days at 20 minute intervals. During trials, some of the mice clung to the rod without moving and were thus passively rotated. The time spent on rotarod, and the time spent in passive rotation were noted. Passive rotation was tabulated only on those trials where the mice used this strategy until the end of the trial. Locomotor activity was measured by the open field test following the protocol of Crawley (Crawley 2007). The mouse was placed in the center of the open field apparatus (2.5 L chambers with wire-mesh floors; Accuscan Instruments Inc. Ohio, USA) and allowed to acclimatize for 10

min, and then data were collected for 60 min. The maze was cleaned with 70% ethanol after each trial. Each mouse was tested once daily for three consecutive days. Data for various motor activities was analyzed using the accompanying Fusion Software (Accuscan Instruments Inc.). After rotarod testing, mice from the same cohort were tested for locomotor activity by the open field test and then again, when 3 months old, for footprint/ gait analysis. The one month-old mice used for footprint/ gait analysis were a separate cohort.

### **Immunofluorescence methodology**

For immunostaining, sections were washed in PBS 3 X 10 minutes each and permeabilized in 0.2% Triton X-100 in PBS for 30 min. Sections were blocked with 8% BSA for 1h and then incubated with primary antibodies goat anti-calbindin-1 (1:250 dilution, Cat No sc-7691, Santa Cruz) or rabbit polyclonal anti-Pcp2 N-terminal antibody (1:200 dilution; Cat No AP6365a, Abgent, San Diego, CA) overnight at 4° C. Sections were washed in PBS containing 1% BSA and incubated with secondary antibodies (Alexa Fluor 594 (Molecular Probes, Invitrogen) anti-goat (1:250 dilution; Cat. No. A11080) or anti-rabbit IgG (1:250 dilution; A21207)) for one hour. After washing sections three times in PBS, mounting medium containing 4', 6-diamidino-2-phenylindole (DAPI) (Vectashield with DAPI, Vector Labs, Burlingame, CA, USA; Cat. H-1200) was added and the slides were incubated for 5 min to provide nuclear counterstaining. Cover slips were then added and the sections visualized under an inverted epifluorescence microscope (Leica DFC500, Leica Microsystems). For visualizing the GFP fluorescence in Pcp2-GFP hemizygous mice, brain sections were put on slides, mounted and visualized

use either epifluorescence or laser confocal microscopy. Cerebellar slices (300  $\mu\text{m}$ ) from these mice were obtained using the Microtome VF-300 (Crystalgen Inc.) according to manufacturer's instructions, maintained in serum-free neuron culture medium (Neurobasal A medium containing B27 and N2 supplements, Invitrogen Inc.) and visualized in a stereo fluorescence microscope (Nikon, C-DSD115).

### **Cresyl violet staining**

Mice from different age populations were anesthetized with avertin and transcardially perfused with cold PBS followed by 4% (w/v) paraformaldehyde in PBS. Brains were carefully removed from the calvarium and kept overnight at 4° C in the same fixative. Brains were allowed to settle down in sucrose (30%) at 4° C and then were sectioned sagittally using a freezing cryotome. Ten-micron thick sections were cut serially and collected on silanated slides. Sections were stained with cresyl violet stain, cleared in xylene and mounted using DPX Mountant (Sigma-Aldrich). Sections were observed using an inverted microscope (Leica DM4000 B) and photographed.

### **Hippocampal histomorphometry**

One week and 3 week-old wild-type and *Gnb5* KO littermates were anesthetized, transcardially perfused with 4% paraformaldehyde and kept in sucrose at 4°C until the brains settled down. Comparable, twenty microns thick, free-floating sagittal sections were stained for calbindin-1 immunoreactivity as described above. The thickness (in pixels) of the calbindin-1 immunostain positive granule and molecular layers were measured using the ImageJ software (Rasband, W.S., ImageJ, U. S. National Institutes of

Health, Bethesda, Maryland, USA, <http://imagej.nih.gov/ij/>, 1997-2011) with the “Measure and Label” plug-in. For each section, 15 or more measurements were taken for each layer at different locations as shown in the corresponding images (see Fig. 5, K, L). The ratio of the thickness of the molecular layer to the granule layer was used in comparisons between *Gnb5* KO and wt mice.

To quantify the number of ectopic dentate gyrus granule cells in the molecular layer, the number of calbindin 1-positive granule cells in the molecular layer, at least one cell body length from the molecular-granule layer interface per section of dentate gyrus were counted.

#### **Laser confocal scanning and intensity analysis**

Images were acquired on a Leica TCS-SP5 confocal microscope (Leica Microsystems) using a 40x/NA1.25 oil immersion objective. GFP was excited with an argon laser at 488 nm. A stack of images was acquired using a step size of 0.17  $\mu\text{m}$ . Huygens Essential (version 3.6; Scientific Imaging BV, Hilversum, The Netherlands) and Imaris (version 7.1; Bitplane AG, Zurich, Switzerland) software were used for deconvolution and image processing.

#### **Additional primary and secondary antibodies employed**

Primary antibodies employed included anti-G $\beta$ 5 N-terminal rabbit polyclonal antibody ATDG (Zhang & Simonds 2000), mouse anti- $\beta$ -actin monoclonal (A5316; Sigma, St. Louis, MO, USA), goat anti-calbindin-1 (C-20), (sc-7691; Santa Cruz Biotechnology, Santa Cruz, CA, USA), rabbit anti-calbindin-2 (HPA007305; Sigma), rabbit anti-

cerebellin (ab64184, Abcam), goat anti-parvalbumin (C-19) (sc-7449; Santa Cruz), goat anti-tropomodulin 3 (Tmod3) (C-13) (sc-19206; Santa Cruz), goat anti-synaptopodin (Synpo) (P-19) (sc-21537; Santa Cruz), mouse anti-Pcp2 (N-terminal) (AP6356a, Abgent) antibodies, rabbit anti-Trim37 polyclonal (13037-1-AP; Proteintech, Chicago, IL, USA), and rabbit anti-GRID2 polyclonal (ab74866; Abcam). Secondary antibody utilized for immunofluorescence was Cy3-conjugated donkey anti-mouse IgG (715-165-150; Jackson ImmunoResearch Labs, West Grove, PA, USA) and for immunoblots was IR secondary antibody (anti-rabbit IR 800 and anti-mouse Red and Green) from LI-COR Bioscience (Lincoln, NE, USA).

### **Microarray analysis**

Microarray analysis was performed with mRNA isolated from the cerebella and non-cerebellar regions of the 2 week old *Gnb5* KO mice and their wild type littermates using RNeasy® mini kit (QIAGEN). The RNA quality was checked by an Agilent Bioanalyzer (Agilent Technologies, Palo Alto, CA, USA). Three pairs of mice from different litters were used for each region of the brain. Target labeling and hybridization to GeneChips were carried out in the NIDDK Microarray Core facility using the GeneChip Mouse 430 2.0 Array (Affymetrix, Santa Clara, CA, USA). Each microarray experiment employed triplicate biological repeats. The microarray signals were normalized using the RMA algorithm. The genes with significantly altered expression were selected based on ANOVA analysis by Partek Pro software (Partek, St. Charles, MO, USA). The genes with ANOVA P values of  $\leq 0.05$  and absolute values of fold-change of  $\geq 1.5$  were used in the gene ontology analysis by the commercial gene pathway analysis web tool

(<http://trials.genego.com/cgi/index.cgi>). The microarray data presented in this publication have been deposited in NCBI's Gene Expression Omnibus (Edgar *et al.* 2002, Barrett *et al.* 2011) and are accessible through GEO Reference Series accession number GSE29083 (<http://www.ncbi.nlm.nih.gov/geo/query/acc.cgi?acc=GSE29083>).

## **2. References for Supplementary Methods**

- Barrett, T., Troup, D. B., Wilhite, S. E. et al. (2011) NCBI GEO: archive for functional genomics data sets--10 years on. *Nucleic acids research*, 39, D1005-1010.
- Crawley, J. N. (2007) Motor Functions. In: *What's Wrong With My Mouse?*, pp. 63-84. John Wiley & Sons, Hoboken, NJ.
- Edgar, R., Domrachev, M. and Lash, A. E. (2002) Gene Expression Omnibus: NCBI gene expression and hybridization array data repository. *Nucleic acids research*, 30, 207-210.
- Le Marec, N. and Lalonde, R. (1997) Sensorimotor learning and retention during equilibrium tests in Purkinje cell degeneration mutant mice. *Brain Res*, 768, 310-316.
- Zhang, J. H. and Simonds, W. F. (2000) Copurification of brain G-protein  $\beta 5$  with RGS6 and RGS7. *J. Neurosci.*, 20: RC59, 1-5.

## **3. Legends to Supplemental Figures**

**Figure S1. Open field locomotor analysis of wild-type, G $\beta 5$  heterozygous, and G $\beta 5$**

**homozygous KO littermates.** Mice of the indicated genotypes were subjected to open field locomotor analysis as described in Materials and Methods, with the results of various parameters shown. (n=6 wild-type, n=4 *Gnb5* heterozygotes and n=11 *Gnb5* KO, \*P < 0.05; \*\*P < 0.02; \*\*\*P < 0.0001; versus wt, two-tailed unpaired t-test).

**Figure S2. Delayed Purkinje cell maturation in the cerebellar cortex of seven-day old G $\beta$ 5-homozygous knockout mice (low power images).** Upper panels: DAPI (blue) and calbindin-1-immunostaining (red) (left), DAPI (blue) and Pcp2-GFP reporter fluorescence (green) (center), and merged (right) images of frozen sections of cerebella of G $\beta$ 5 wild-type and KO mouse littermates. Lower panels: DAPI (blue) and Pcp2-immunostaining (red) (left), DAPI (blue) and Pcp2-GFP reporter fluorescence (green) (center), and merged (right) images of frozen sections of cerebella of G $\beta$ 5 wild-type and KO mouse littermates.

**Figure S3. Delayed cerebellar development in *Gnb5* knockout mice.** Analysis of Pcp2-GFP hemizygous *Gnb5* KO (A, C, E) and Pcp2-GFP hemizygous *Gnb5* wild-type (B, D, F) littermate mice. (A, B) Epifluorescence of vibratome sections of 4-6 day old littermates showing faint green Pcp2-GFP signal in periphery of wild-type sections. (C, D) Whole brains dissected from seven to 10 day old mice showing faint, limited cerebellar fluorescence in G $\beta$ 5 homozygous KO mice compared to bright, extensive signal in wild-type littermates. (E, F) Whole brains dissected from 14-15 day old mice showing comparable cerebellar fluorescence in G $\beta$ 5 KO and wild-type mice.



**Figure S4. Wild-type mouse brain para-sagittal sections stained with cresyl violet**

Morphological changes of the angular zone (AZ) of dentate gyrus during mouse brain development. Wild type mouse brains at indicated postnatal developmental stages were para-sagittally sectioned and Nissl stained with cresyl violet (left). The corresponding mediolateral positions of para-sagittal planes A and B in the displayed sections of the mouse brains are indicated (right). Section images were captured at 50 X magnification.

**Figure S5. Venn diagram of *Gnb5*-regulated genes identified by microarray analysis**

Identification of *Gnb5* target genes in cerebellar and non-cerebellar regions of mouse brain using whole genome oligo microarray. Bioinformatic analysis of gene expression, comparing transcripts from wild type and *Gnb5* KO mouse brain regions, identified 150 genes (256 probe sets; see corresponding probe set IDs in Supplemental Table 1) in cerebellar regions and 228 genes (346 probe sets; see corresponding probe set IDs in Supplemental Table 2) in non-cerebellar brain regions as well as 39 genes common to both regions (69 probe sets; see corresponding probe set IDs in Supplemental Table 3) that are regulated by *Gnb5* gene.

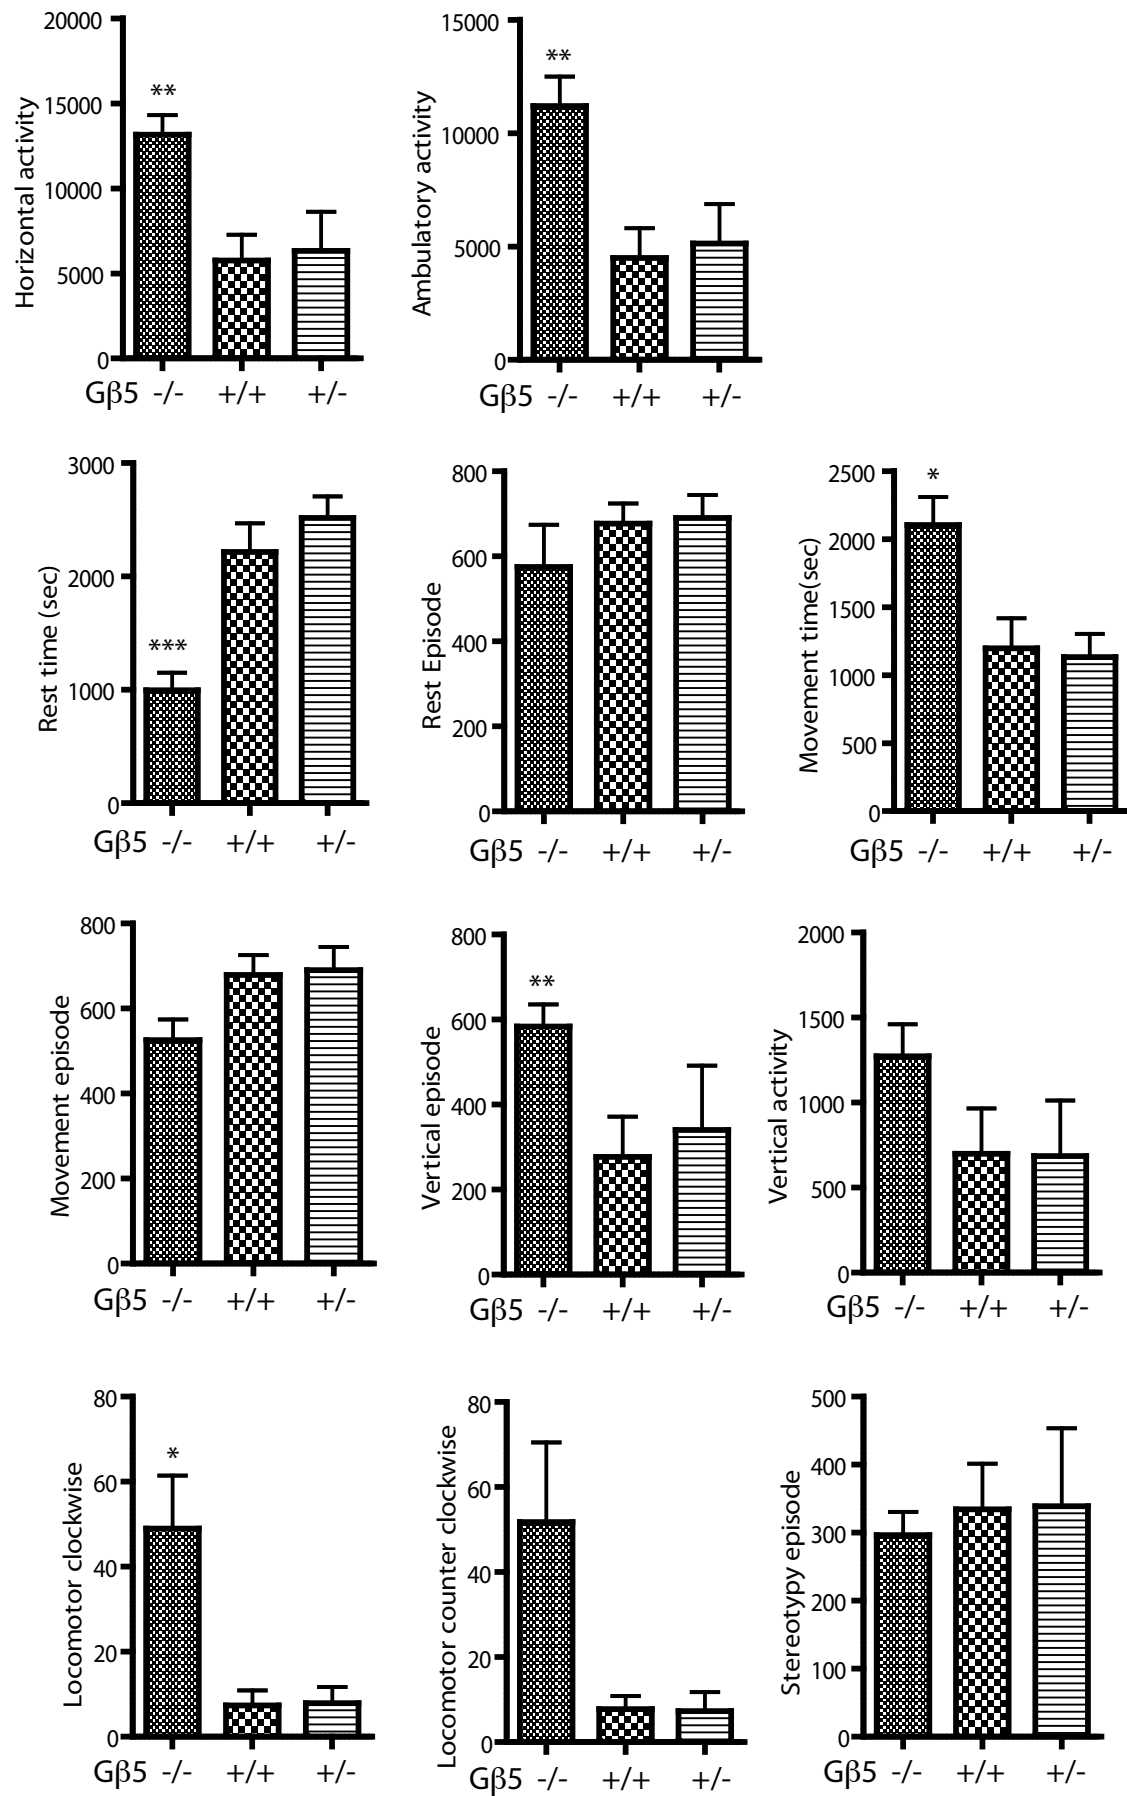

Suppl. Fig. 1 Zhang *et al*

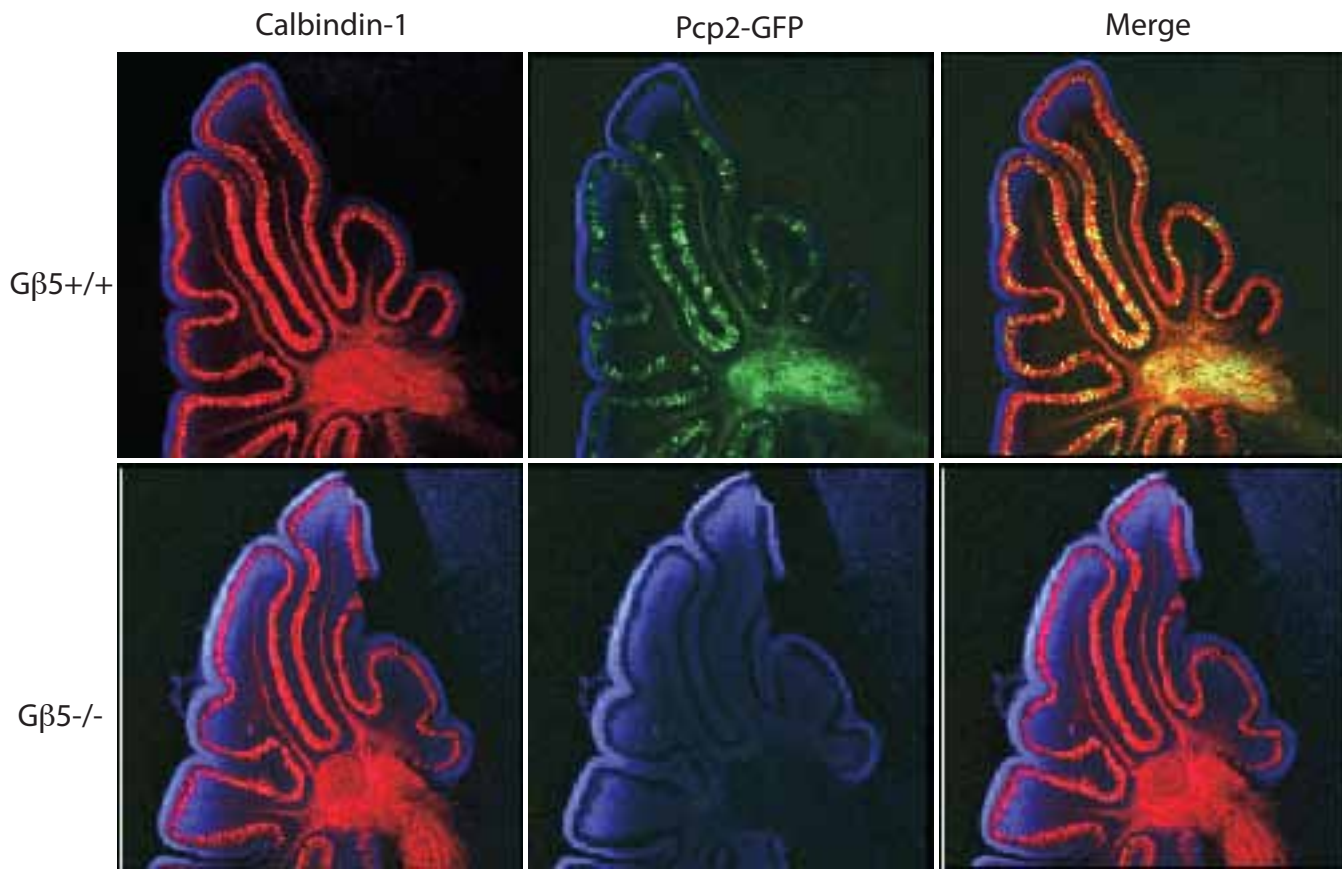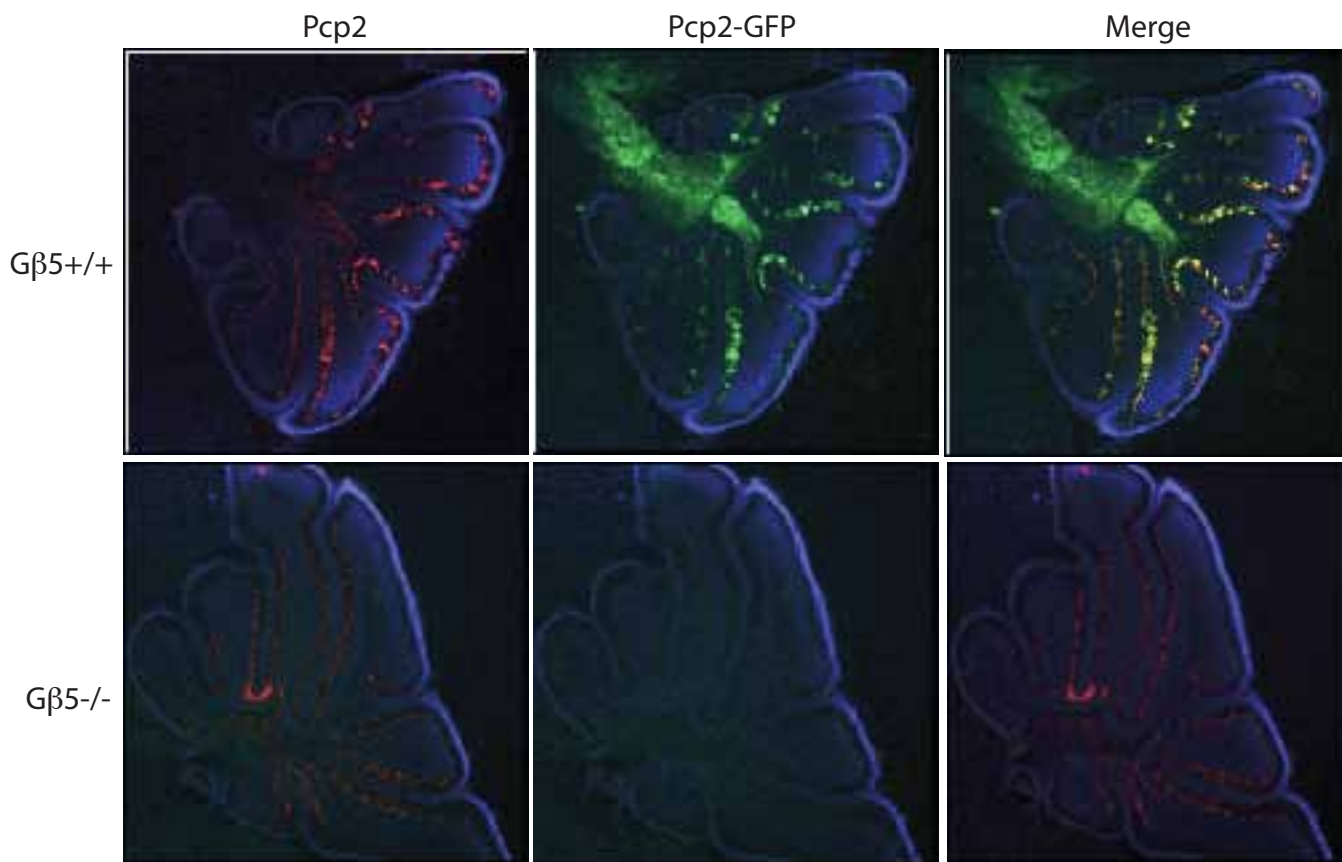

Suppl. Fig. 2 Zhang *et al*

Gβ5 -/-

Gβ5 +/+

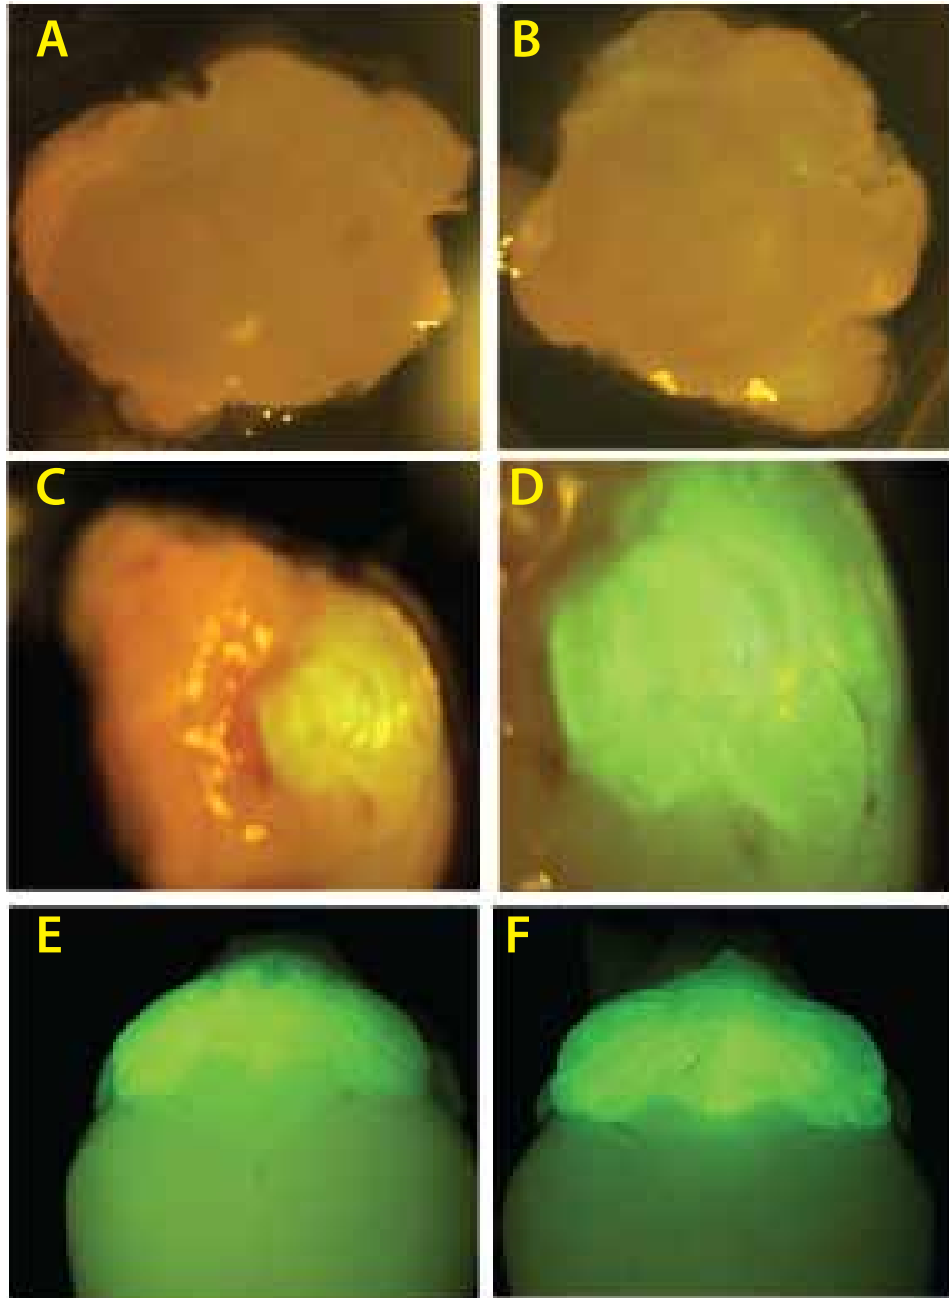

Suppl. Fig. 3 Zhang *et al*

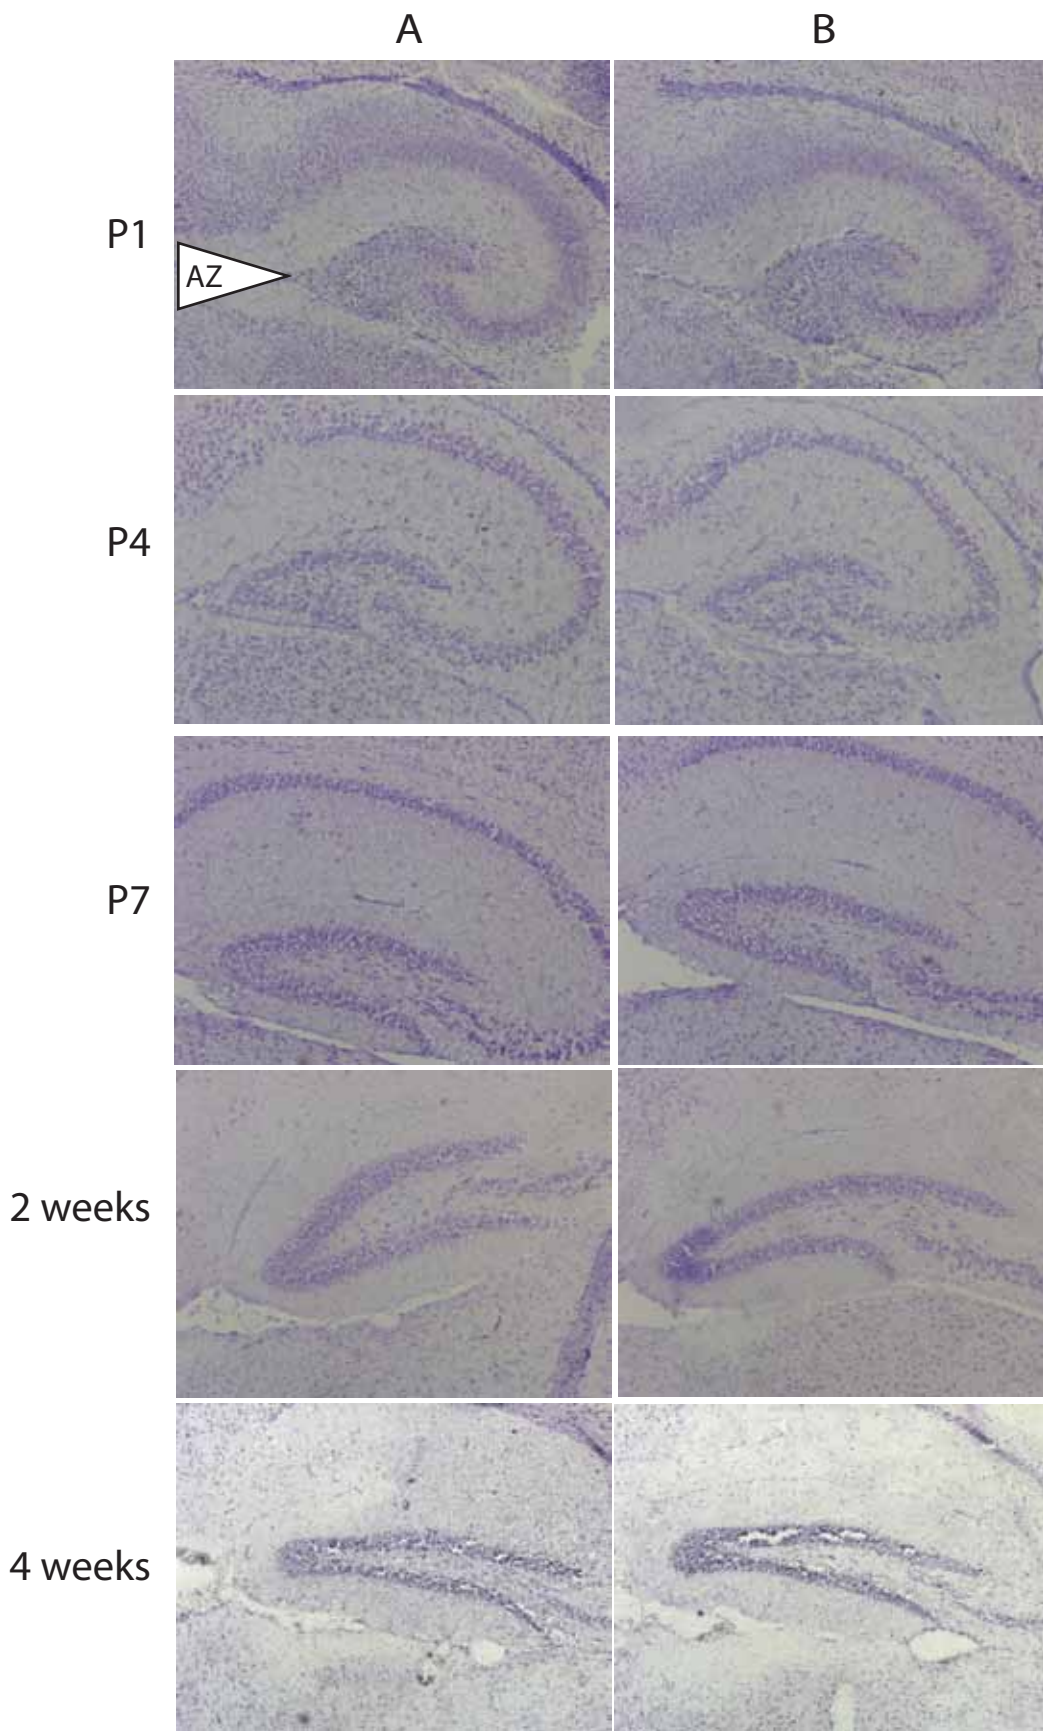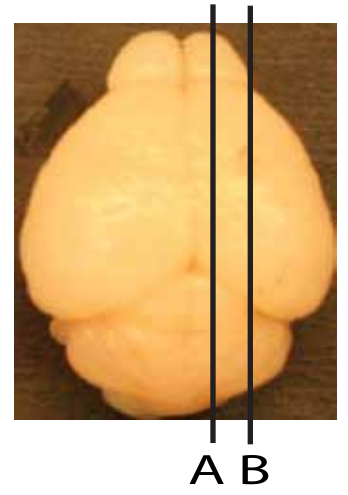

Suppl. Fig. 4 Zhang *et al*

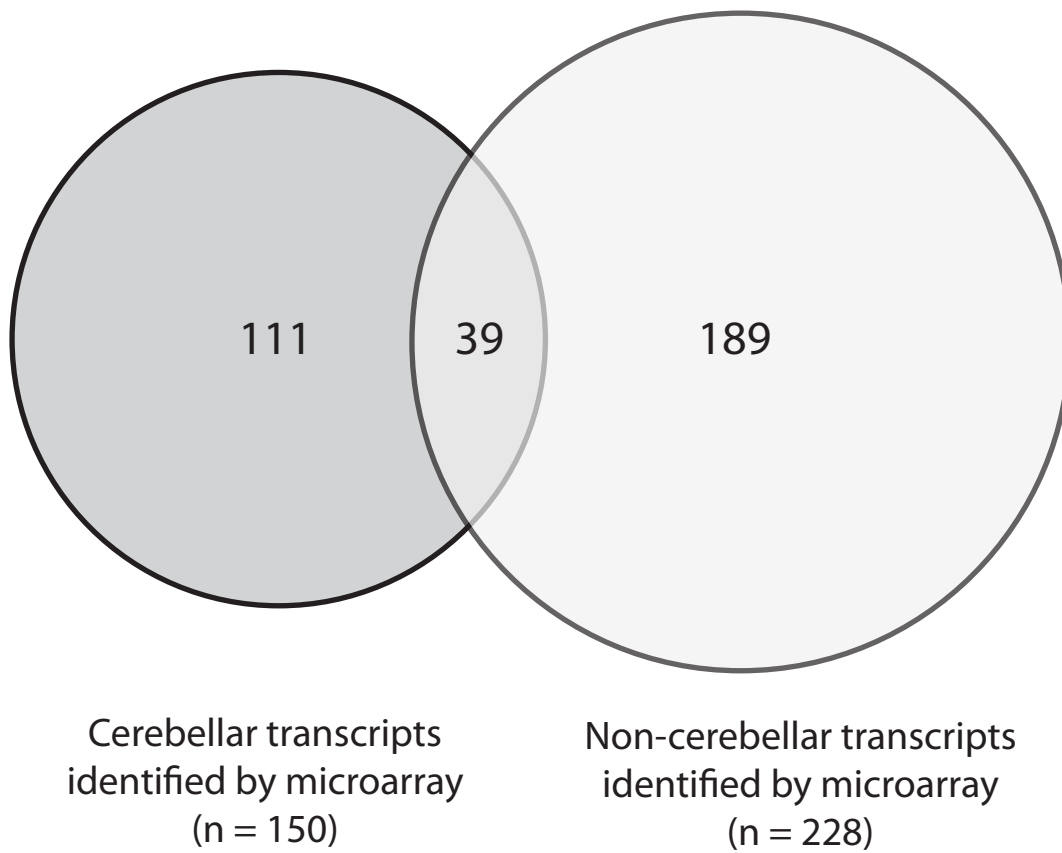

Suppl. Fig. 5 Zhang *et al*

Supplemental Table 1.  
Comparison of cerebellar gene expression differences between wild type and Gnb5 KO mice.

| <b>Affymetrix<br/>Gene Chip<br/>Probe set ID</b> | <b>Gene<br/>Symbol</b> | <b>Gene Title</b>                                          | <b>RefSeq Transcript ID</b>   | <b>p-value<br/>(KO vs. WT)</b> | <b>Fold-Change<br/>(KO vs. WT)</b> |
|--------------------------------------------------|------------------------|------------------------------------------------------------|-------------------------------|--------------------------------|------------------------------------|
| 1446433_at                                       | Acbd5                  | acyl-Coenzyme A binding domain containing 5                | NM_001102436 /// NM_001102436 | 0.020                          | -1.59                              |
| 1436742_a_at                                     | Accsl                  | 1-aminocyclopropane-1-carboxylate synthase homolog         | NM_001033452                  | 0.020                          | 1.59                               |
| 1449895_at                                       | Acr                    | acrosin prepropeptide                                      | NM_013455                     | 0.014                          | 1.78                               |
| 1434068_s_at                                     | AI662270               | expressed sequence AI662270                                | NR_015519 /// XM_001474264    | 0.043                          | -1.53                              |
| 1434730_at                                       | AI854517               | expressed sequence AI854517                                | XM_979851 /// XM_982358       | 0.033                          | 1.53                               |
| 1451675_a_at                                     | Alas2                  | aminolevulinic acid synthase 2, erythroid                  | NM_001102446 /// NM_009653    | 0.019                          | -4.23                              |
| 1457307_at                                       | Apol11b                | apolipoprotein L 11b                                       | NM_001143686 /// XR_001572    | 0.004                          | -4.75                              |
| 1458613_at                                       | Arrdc1                 | arrestin domain containing 1                               | NM_001162485 /// NM_178408    | 0.020                          | 1.53                               |
| 1424759_at                                       | Arrdc4                 | arrestin domain containing 4                               | NM_001042592 /// NM_025549    | 0.005                          | 2.21                               |
| 1455851_at                                       | Bmp5                   | bone morphogenetic protein 5                               | NM_007555                     | 0.010                          | -1.66                              |
| 1417325_at                                       | Btrc                   | beta-transducin repeat containing protein                  | NM_001037758 /// NM_009771    | 0.043                          | 1.54                               |
| 1417461_at                                       | Cap1                   | CAP, adenylate cyclase-associated protein 1 (yeast)        | NM_007598                     | 0.002                          | -5.39                              |
| 1452218_at                                       | Ccdc117                | coiled-coil domain containing 117                          | NM_134033                     | 0.004                          | -1.56                              |
| 1451799_at                                       | Ccdc25                 | coiled-coil domain containing 25                           | NM_145944                     | 0.013                          | -1.59                              |
| 1430190_at                                       | Ccdc30                 | coiled-coil domain containing 30                           | NM_029286                     | 0.005                          | 1.63                               |
| 1456168_at                                       | Ccnjl                  | cyclin J-like                                              | NM_001045530                  | 0.016                          | -1.66                              |
| 1424727_at                                       | Ccr5                   | chemokine (C-C motif) receptor 5                           | NM_009917                     | 0.026                          | -1.52                              |
| 1460538_at                                       | Cdh10                  | cadherin 10                                                | NM_009865                     | 0.003                          | -1.97                              |
| 1453482_at                                       | Cflar                  | CASP8 and FADD-like apoptosis regulator                    | NM_009805 /// NM_207653       | 0.008                          | 2.35                               |
| 1450427_at                                       | Chrna6                 | cholinergic receptor, nicotinic, alpha polypeptide 6       | NM_021369                     | 0.021                          | -1.67                              |
| 1437271_at                                       | Clcf1                  | cardiotrophin-like cytokine factor 1                       | NM_019952                     | 0.014                          | 1.75                               |
| 1426684_at                                       | Cnot6                  | CCR4-NOT transcription complex, subunit 6                  | NM_212484                     | 0.026                          | -1.59                              |
| 1434411_at                                       | Col12a1                | collagen, type XII, alpha 1                                | NM_007730                     | 0.001                          | -4.27                              |
| 1449847_a_at                                     | Col4a3bp               | collagen, type IV, alpha 3 (Goodpasture antigen)           | NM_001164222 /// NM_023420    | 0.046                          | 1.58                               |
| 1441558_at                                       | D230044B12Rik          | RIKEN cDNA D230044B12 gene                                 | ---                           | 0.011                          | -1.57                              |
| 1457668_x_at                                     | D4Ertd617e             | DNA segment, Chr 4, ERATO Doi 617, expressed in            | NR_029469 /// XM_001473428    | 0.003                          | 1.97                               |
| 1455474_at                                       | D6Wsu116e              | DNA segment, Chr 6, Wayne State University 116e            | NM_026585                     | 0.009                          | 1.65                               |
| 1438962_s_at                                     | Ddx31                  | DEAD/H (Asp-Glu-Ala-Asp/His) box polypeptide : DDX31       | NM_001033294                  | 0.022                          | -1.57                              |
| 1435132_at                                       | Disp1                  | dispatched homolog 1 (Drosophila)                          | NM_026866                     | 0.027                          | 1.84                               |
| 1458220_at                                       | Dlc1                   | deleted in liver cancer 1                                  | NM_015802                     | 0.046                          | -3.53                              |
| 1427410_at                                       | Dleu2                  | deleted in lymphocytic leukemia, 2                         | NR_028264 /// XM_001000367    | 0.025                          | -2.10                              |
| 1429573_at                                       | Dmrtc1a                | DMRT-like family C1a                                       | NM_001038616 /// NM_027591    | 0.011                          | 1.54                               |
| 1430291_at                                       | Dock5                  | dedicator of cytokinesis 5                                 | NM_177780                     | 0.014                          | -1.61                              |
| 1460372_at                                       | Duoxa1                 | dual oxidase maturation factor 1                           | NM_145395                     | 0.031                          | 1.53                               |
| 1418276_at                                       | Elf2                   | E74-like factor 2                                          | NM_023502                     | 0.047                          | -1.50                              |
| 1440354_at                                       | Elov17                 | ELOVL family member 7, elongation of long chain fatty acid | NM_029001                     | 0.026                          | -1.58                              |

Supplemental Table 1.  
Comparison of cerebellar gene expression differences between wild type and Gnb5 KO mice.

|              |                               |                                                           |                               |       |        |
|--------------|-------------------------------|-----------------------------------------------------------|-------------------------------|-------|--------|
| 1418294_at   | Epb4.1l4b                     | erythrocyte protein band 4.1-like 4b                      | NM_019427 /// XM_001476161    | 0.006 | 2.00   |
| 1429914_at   | Epc1                          | enhancer of polycomb homolog 1 (Drosophila)               | NM_007935 /// NM_027497       | 0.024 | 1.64   |
| 1435663_at   | Esr1                          | estrogen receptor 1 (alpha)                               | NM_007956                     | 0.016 | 1.93   |
| 1438427_at   | Fam120b                       | family with sequence similarity 120, member B             | NM_024203 /// NR_033586       | 0.009 | 1.89   |
| 1448021_at   | Fam46c                        | family with sequence similarity 46, member C              | NM_001142952 /// XR_001536    | 0.005 | -4.15  |
| 1436550_at   | Fbxo30                        | F-box protein 30                                          | NM_001168297 /// NM_027968    | 0.014 | -1.88  |
| 1418243_at   | Fcna                          | ficolin A                                                 | NM_007995                     | 0.001 | 1.50   |
| 1418323_at   | Fem1b                         | feminization 1 homolog b (C. elegans)                     | NM_010193                     | 0.012 | 2.02   |
| 1419322_at   | Fgd6                          | FYVE, RhoGEF and PH domain containing 6                   | NM_053072                     | 0.015 | 1.54   |
| 1436650_at   | Filip1                        | filamin A interacting protein 1                           | NM_001081243                  | 0.008 | 2.12   |
| 1416693_at   | Foxc2                         | forkhead box C2                                           | NM_013519                     | 0.001 | -1.58  |
| 1444066_at   | Gapvd1                        | GTPase activating protein and VPS9 domains 1              | NM_025709                     | 0.010 | -1.69  |
| 1460431_at   | Gcnt1                         | glucosaminyl (N-acetyl) transferase 1, core 2             | NM_001136484 /// NM_010265    | 0.010 | -1.77  |
| 1438648_x_at | Gkn3                          | gastrokine 3                                              | NM_026860                     | 0.022 | -1.57  |
| 1427455_x_at | Gm10883 /// Gm1424            | predicted gene 10883 /// predicted gene 1420 ///          | XM_001476664 /// XM_001476664 | 0.010 | -1.79  |
| 1421683_at   | Gm3417 /// Gm3444             | predicted gene 3417 /// predicted gene 3448 /// t-        | NM_001123367 /// NM_001123367 | 0.025 | 1.54   |
| 1437418_at   | Gm3515                        | predicted gene 3515                                       | XM_001477025                  | 0.025 | -1.78  |
| 1430295_at   | Gna13                         | guanine nucleotide binding protein, alpha 13              | NM_010303                     | 0.003 | 1.51   |
| 1422208_a_at | Gnb5                          | guanine nucleotide binding protein (G protein), beta      | NM_010313 /// NM_138719       | 0.000 | -40.76 |
| 1425138_at   | Guca1b                        | guanylate cyclase activator 1B                            | NM_146079                     | 0.000 | 27.94  |
| 1430357_at   | H3f3b                         | H3 histone, family 3B                                     | NM_008211                     | 0.024 | 1.52   |
| 1452757_s_at | Hba-a1 /// Hba-a2             | hemoglobin alpha, adult chain 1 /// hemoglobin alpha      | NM_001083955 /// NM_008218    | 0.033 | -2.13  |
| 1417184_s_at | Hbb-b1 /// Hbb-b2             | hemoglobin, beta adult major chain /// hemoglobin beta    | NM_008220 /// NM_016956       | 0.008 | -1.70  |
| 1427865_at   | Hbb-b2                        | hemoglobin, beta adult minor chain                        | NM_016956                     | 0.010 | -1.51  |
| 1438328_at   | Hcfc2                         | host cell factor C2                                       | NM_001081218                  | 0.014 | -1.60  |
| 1425378_at   | Herc1                         | hect (homologous to the E6-AP (UBE3A) carboxyl domain)    | NM_145617 /// XM_001477062    | 0.035 | 1.58   |
| 1420573_at   | Hoxd1                         | homeobox D1                                               | NM_010467                     | 0.002 | -2.40  |
| 1431182_at   | Hspa8 /// LOC6248             | heat shock protein 8 /// hypothetical LOC624853           | NM_031165 /// NR_015570 /// X | 0.004 | -1.73  |
| 1425201_a_at | Hyi                           | hydroxypyruvate isomerase homolog (E. coli)               | NM_026601 /// NR_003946       | 0.004 | 1.81   |
| 1415931_at   | Igf2                          | insulin-like growth factor 2                              | NM_001122736 /// NM_001122736 | 0.012 | -1.60  |
| 1419569_a_at | Isg20                         | interferon-stimulated protein                             | NM_001113527 /// NM_020583    | 0.017 | -4.07  |
| 1433902_at   | Kbtbd8                        | kelch repeat and BTB (POZ) domain containing 8            | NM_001008785 /// NM_001102102 | 0.017 | -1.67  |
| 1455182_at   | Kif1b                         | kinesin family member 1B                                  | NM_008441 /// NM_207682       | 0.015 | -1.56  |
| 1438247_at   | Klhl15                        | kelch-like 15 (Drosophila)                                | NM_001039059 /// NM_001039059 | 0.035 | 1.59   |
| 1430340_at   | Lca5                          | Leber congenital amaurosis 5 (human)                      | NM_027448 /// NM_029434       | 0.007 | 1.52   |
| 1431792_a_at | LOC100047492 /// LOC100047492 | similar to serine/threonine kinase 11 interacting protein | NM_027886 /// XM_001478275    | 0.007 | 1.58   |
| 1416632_at   | LOC677317 /// Me1             | similar to NADP-dependent malic enzyme (NADP-dependent)   | NM_008615 /// XM_001004685    | 0.016 | 1.54   |
| 1431056_a_at | Lpl                           | lipoprotein lipase                                        | NM_008509                     | 0.028 | 1.52   |
| 1447954_at   | Lrrc49                        | leucine rich repeat containing 49                         | NM_001146046 /// NM_001146046 | 0.037 | 1.63   |
| 1428626_at   | Lysmd2                        | LysM, putative peptidoglycan-binding, domain containing   | NM_027309                     | 0.005 | 1.69   |



Supplemental Table 1.  
Comparison of cerebellar gene expression differences between wild type and Gnb5 KO mice.

|              |          |                                                                     |                               |       |       |
|--------------|----------|---------------------------------------------------------------------|-------------------------------|-------|-------|
| 1438352_at   | Mapre2   | Microtubule-associated protein, RP/EB family, member 2              | NM_001162941 /// NM_001162941 | 0.040 | -1.52 |
| 1436415_at   | Med29    | mediator complex subunit 29                                         | NM_026042                     | 0.025 | 1.56  |
| 1457836_at   | Mfsd11   | major facilitator superfamily domain containing 11                  | NM_178620                     | 0.034 | 1.60  |
| 1434322_at   | Micall2  | MICAL-like 2                                                        | NM_174850                     | 0.024 | 1.70  |
| 1430798_x_at | Mrpl15   | mitochondrial ribosomal protein L15                                 | NM_001177658 /// NM_025300    | 0.016 | 2.22  |
| 1443021_at   | Mthfs    | 5, 10-methenyltetrahydrofolate synthetase                           | NM_026829                     | 0.017 | 1.74  |
| 1455645_at   | Mybpc1   | myosin binding protein C, slow-type                                 | NM_175418                     | 0.047 | 1.54  |
| 1426851_a_at | Nov      | nephroblastoma overexpressed gene                                   | NM_010930                     | 0.005 | -1.89 |
| 1419662_at   | Ogn      | osteoglycin                                                         | NM_008760                     | 0.030 | -1.51 |
| 1444029_at   | Parp11   | poly (ADP-ribose) polymerase family, member 11                      | NM_181402                     | 0.019 | 2.23  |
| 1438946_at   | Pdgfra   | platelet derived growth factor receptor, alpha polypeptide          | NM_001083316 /// NM_011058    | 0.045 | 1.91  |
| 1449374_at   | Pipox    | pipecolic acid oxidase                                              | NM_008952                     | 0.020 | 1.59  |
| 1436712_at   | Pla2g4c  | phospholipase A2, group IVC (cytosolic, calcium-dependent)          | NM_001004762 /// NM_001168    | 0.001 | -1.52 |
| 1429862_at   | Pla2g4e  | phospholipase A2, group IVE                                         | NM_177845                     | 0.006 | 1.55  |
| 1439840_at   | Polb     | polymerase (DNA directed), beta                                     | NM_011130                     | 0.006 | -1.69 |
| 1426839_at   | Pold3    | polymerase (DNA-directed), delta 3, accessory subunit               | NM_133692                     | 0.029 | 1.65  |
| 1418480_at   | Ppbp     | pro-platelet basic protein                                          | NM_023785                     | 0.001 | -2.24 |
| 1431505_at   | Ppih     | peptidyl prolyl isomerase H                                         | NM_001110129 /// NM_001110129 | 0.002 | -2.75 |
| 1456805_a_at | Ppp4r1l  | protein phosphatase 4, regulatory subunit 1-like                    | NR_027957 /// XM_001481221    | 0.012 | 1.54  |
| 1452473_at   | Prr15    | proline rich 15                                                     | NM_030024                     | 0.004 | 1.54  |
| 1450680_at   | Rag1     | recombination activating gene 1                                     | NM_009019                     | 0.002 | -1.56 |
| 1444441_at   | Rapgef1l | Rap guanine nucleotide exchange factor (GEF)-like 1                 | NM_001080925                  | 0.009 | 1.81  |
| 1431749_a_at | Rasgrp1  | RAS guanyl releasing protein 1                                      | NM_011246                     | 0.025 | 1.72  |
| 1425166_at   | Rbl1     | retinoblastoma-like 1 (p107)                                        | NM_001139516 /// NM_011249    | 0.018 | 1.51  |
| 1435158_at   | Rbm12b   | RNA binding motif protein 12B                                       | NM_028226                     | 0.050 | -1.63 |
| 1429169_at   | Rbm3     | RNA binding motif protein 3                                         | NM_001166409 /// NM_001166409 | 0.017 | -4.77 |
| 1416355_at   | Rbmx     | RNA binding motif protein, X chromosome                             | NM_001166623 /// NM_011252    | 0.009 | -1.64 |
| 1443215_at   | Rims2    | regulating synaptic membrane exocytosis 2                           | NM_053271                     | 0.025 | 2.29  |
| 1459573_at   | Rpf1     | ribosome production factor 1 homolog (S. cerevisiae)                | NM_027332 /// NM_027371       | 0.039 | 1.50  |
| 1434817_s_at | Rprd2    | regulation of nuclear pre-mRNA domain containing 2                  | NM_001081293                  | 0.002 | 1.92  |
| 1453466_at   | Rps6     | ribosomal protein S6                                                | NM_009096                     | 0.012 | 2.00  |
| 1436058_at   | Rsad2    | radical S-adenosyl methionine domain containing 2                   | NM_021384                     | 0.002 | -4.51 |
| 1421009_at   | Rsad2    | radical S-adenosyl methionine domain containing 2                   | NM_021384                     | 0.003 | -4.60 |
| 1458882_at   | Serpinh8 | serine (or cysteine) peptidase inhibitor, clade B, member 8         | NM_001159748 /// NM_011459    | 0.043 | -1.53 |
| 1436871_at   | Sfrs7    | splicing factor, arginine/serine-rich 7                             | NM_146083                     | 0.006 | 1.79  |
| 1417750_a_at | Slc25a37 | solute carrier family 25, member 37                                 | NM_026331                     | 0.015 | -1.93 |
| 1415958_at   | Slc2a4   | solute carrier family 2 (facilitated glucose transporter), member 4 | NM_009204                     | 0.005 | 1.52  |
| 1421249_at   | Slc39a9  | solute carrier family 39 (zinc transporter), member 9               | NM_026244 /// XM_001472453    | 0.001 | 1.69  |
| 1418395_at   | Slc47a1  | solute carrier family 47, member 1                                  | NM_026183                     | 0.045 | -1.51 |
| 1416464_at   | Slc4a1   | solute carrier family 4 (anion exchanger), member 1                 | NM_011403                     | 0.021 | -3.17 |

Supplemental Table 1.  
Comparison of cerebellar gene expression differences between wild type and Gnb5 KO mice.

|              |          |                                                     |                               |       |       |
|--------------|----------|-----------------------------------------------------|-------------------------------|-------|-------|
| 1434502_x_at | Slc4a1   | solute carrier family 4 (anion exchanger), membe    | NM_011403                     | 0.021 | -3.72 |
| 1417415_at   | Slc6a3   | solute carrier family 6 (neurotransmitter transport | NM_010020                     | 0.014 | -2.51 |
| 1426690_a_at | Srebf1   | sterol regulatory element binding transcription fac | NM_011480                     | 0.028 | 1.63  |
| 1436257_at   | Ss18     | synovial sarcoma translocation, Chromosome 18       | NM_001161369 /// NM_001161    | 0.044 | -1.55 |
| 1444053_at   | Ssbp1    | single-stranded DNA binding protein 1               | NM_028358 /// NM_212468       | 0.018 | 1.53  |
| 1436561_at   | Suv39h2  | suppressor of variegation 3-9 homolog 2 (Drosop     | NM_022724 /// NR_027509       | 0.000 | -1.55 |
| 1455171_at   | Suv420h1 | suppressor of variegation 4-20 homolog 1 (Drosoc    | NM_001167884 /// NM_001167    | 0.009 | 1.52  |
| 1427045_at   | Synpo    | synaptopodin                                        | NM_001109975 /// NM_177340    | 0.025 | 1.54  |
| 1450281_a_at | Tbata    | thymus, brain and testes associated                 | NM_001017407 /// NM_001017    | 0.040 | -1.62 |
| 1455336_at   | Thap2    | THAP domain containing, apoptosis associated p      | NM_025780                     | 0.012 | -1.53 |
| 1448529_at   | Thbd     | thrombomodulin                                      | NM_009378                     | 0.003 | -1.65 |
| 1454018_at   | Tlk2     | tousled-like kinase 2 (Arabidopsis)                 | NM_001112705 /// NM_011903    | 0.008 | 1.88  |
| 1425079_at   | Tm6sf2   | transmembrane 6 superfamily member 2                | NM_181540                     | 0.004 | -1.77 |
| 1443619_at   | Tmem30a  | transmembrane protein 30A                           | NM_133718                     | 0.001 | -8.96 |
| 1438556_a_at | Tmod3    | tropomodulin 3                                      | NM_016963                     | 0.001 | -6.31 |
| 1430579_at   | Tnik     | TRAF2 and NCK interacting kinase                    | NM_001163007 /// NM_001163    | 0.027 | 1.53  |
| 1436394_at   | Trim37   | tripartite motif-containing 37                      | NM_197987                     | 0.014 | 1.54  |
| 1438542_at   | Trim53   | Transformation related protein 53                   | NM_001127233 /// NM_011640    | 0.028 | 1.83  |
| 1439989_at   | Tsc1     | tuberous sclerosis 1                                | NM_022887                     | 0.031 | 1.50  |
| 1420587_at   | Tsga13   | testis specific gene A13                            | NM_054073                     | 0.036 | 2.02  |
| 1424649_a_at | Tspan8   | tetraspanin 8                                       | NM_001168679 /// NM_001168    | 0.008 | -1.86 |
| 1444214_at   | Tubb1    | tubulin, beta 1                                     | NM_001080971                  | 0.035 | -1.76 |
| 1415996_at   | Txnip    | thioredoxin interacting protein                     | NM_001009935 /// NM_023719    | 0.004 | 1.65  |
| 1429363_at   | Vps37a   | vacuolar protein sorting 37A (yeast)                | NM_033560                     | 0.011 | -1.80 |
| 1435386_at   | Vwf      | Von Willebrand factor homolog                       | NM_011708                     | 0.007 | 1.55  |
| 1416084_at   | Zfand5   | zinc finger, AN1-type domain 5                      | NM_009551                     | 0.046 | 1.72  |
| 1425098_at   | Zfp106   | zinc finger protein 106                             | NM_011743                     | 0.032 | 1.50  |
| 1425010_at   | Zfp119   | zinc finger protein 119                             | NM_144546                     | 0.032 | -1.64 |
| 1459690_at   | Zfp426   | zinc finger protein 426                             | NM_001110309 /// NM_146221    | 0.023 | 1.54  |
| 1439475_at   | Zfp429   | zinc finger protein 429                             | NM_001080941                  | 0.020 | -1.67 |
| 1439869_at   | Zfp493   | zinc finger protein 493                             | NM_028402 /// XM_619117 /// X | 0.001 | -1.53 |
| 1451902_at   | Zfp758   | zinc finger protein 758                             | NM_145484                     | 0.043 | -1.53 |
| 1427499_at   | Zfp81    | zinc finger protein 81                              | NM_207541                     | 0.008 | 1.64  |
| 1452610_at   | Zkscan14 | zinc finger with KRAB and SCAN domains 14           | NM_023322                     | 0.013 | 1.67  |

Supplemental Table 2.

Comparison of non-cerebellar gene expression differences between wild type and Gnb5 KO mice.

| Affymetrix<br>Gene Chip<br>Probe set ID | Gene<br>Symbol        | Gene Title                                                          | RefSeq Transcript ID        | p-value<br>(KO vs. WT) | Fold-Change<br>(KO vs. WT) |
|-----------------------------------------|-----------------------|---------------------------------------------------------------------|-----------------------------|------------------------|----------------------------|
| 1418043_at                              | Abcc5                 | ATP-binding cassette, sub-family C (CFTR/MRP), member 5             | NM_013790 /// NM_176839     | 0.026                  | 1.55                       |
| 1449895_at                              | Acr                   | acrosin prepropeptide                                               | NM_013455                   | 0.003                  | 1.61                       |
| 1460316_at                              | Acsl1                 | acyl-CoA synthetase long-chain family member 1                      | NM_007981                   | 0.039                  | -1.52                      |
| 1435825_at                              | Acvrl1                | activin A receptor, type II-like 1                                  | NM_009612                   | 0.002                  | 1.87                       |
| 1448539_a_at                            | Acy3                  | aspartoacylase (aminoacylase) 3                                     | NM_027857                   | 0.020                  | 1.58                       |
| 1457042_at                              | AI256396              | EST AI256396                                                        | ---                         | 0.007                  | -1.70                      |
| 1437923_at                              | AI314760              | expressed sequence AI314760                                         | ---                         | 0.026                  | -1.53                      |
| 1451634_at                              | Airn                  | antisense Igf2r RNA                                                 | NR_002853 /// NR_027772 /// | 0.022                  | -1.63                      |
| 1450455_s_at                            | Akr1c12 /// Akr1c13   | aldo-keto reductase family 1, member C12 /// aldo-keto reduct       | NM_013777 /// NM_013778     | 0.013                  | 1.52                       |
| 1447734_x_at                            | Aldoa                 | aldolase A, fructose-bisphosphate                                   | NM_001177307 /// NM_00117   | 0.008                  | -1.57                      |
| 1436071_at                              | Ankrd26               | ankyrin repeat domain 26                                            | NM_001081112                | 0.017                  | -1.54                      |
| 1460449_at                              | Anks1b                | ankyrin repeat and sterile alpha motif domain containing 1B         | NM_001128086 /// NM_00117   | 0.034                  | -1.69                      |
| 1457303_at                              | Anks3                 | ankyrin repeat and sterile alpha motif domain containing 3          | NM_028301                   | 0.015                  | 1.53                       |
| 1449396_at                              | Aoc3                  | amine oxidase, copper containing 3                                  | NM_009675                   | 0.035                  | -1.53                      |
| 1428607_at                              | Araf                  | v-raf murine sarcoma 3611 viral oncogene homolog                    | NM_001159645 /// NM_00970   | 0.005                  | -1.75                      |
| 1436258_at                              | Arhgef9               | CDC42 guanine nucleotide exchange factor (GEF) 9                    | NM_001033329                | 0.029                  | -1.67                      |
| 1424020_at                              | Arl6ip6               | ADP-ribosylation factor-like 6 interacting protein 6                | NM_022989                   | 0.008                  | -1.91                      |
| 1437849_x_at                            | Armxc2                | armadillo repeat containing, X-linked 2                             | NM_001166397 /// NM_00116   | 0.038                  | -1.52                      |
| 1458613_at                              | Arndc1                | arrestin domain containing 1                                        | NM_001162485 /// NM_17840   | 0.049                  | 1.72                       |
| 1424759_at                              | Arndc4                | arrestin domain containing 4                                        | NM_001042592 /// NM_02554   | 0.004                  | 2.22                       |
| 1438921_at                              | Atr                   | Ataxia telangiectasia and Rad3 related                              | NM_019864                   | 0.000                  | -1.72                      |
| 1433599_at                              | Baz1a                 | bromodomain adjacent to zinc finger domain 1A                       | NM_013815 /// XM_885873 /// | 0.015                  | -1.54                      |
| 1435761_at                              | BC100530 /// Stfa1    | cDNA sequence BC100530 /// stefin A1                                | NM_001082543 /// NM_00108   | 0.015                  | 2.23                       |
| 1443837_x_at                            | Bcl2                  | B-cell leukemia/lymphoma 2                                          | NM_009741 /// NM_177410 /// | 0.031                  | -1.56                      |
| 1439431_x_at                            | Bicd1                 | bicaudal D homolog 1 (Drosophila)                                   | NM_001112796 /// NM_00975   | 0.008                  | -1.58                      |
| 1455851_at                              | Bmp5                  | bone morphogenetic protein 5                                        | NM_007555                   | 0.001                  | -1.86                      |
| 1456141_x_at                            | Brcc3                 | BRCA1/BRCA2-containing complex, subunit 3                           | NM_001166457 /// NM_00116   | 0.032                  | -1.66                      |
| 1437455_a_at                            | Btg1 /// LOC100047353 | B-cell translocation gene 1, anti-proliferative /// similar to myoc | NM_007569 /// XM_00147796   | 0.044                  | -1.50                      |
| 1458879_at                              | C76798                | expressed sequence C76798                                           | ---                         | 0.002                  | -1.61                      |
| 1459610_at                              | C87490                | expressed sequence C87490                                           | ---                         | 0.002                  | 1.69                       |
| 1435146_s_at                            | Cadm2                 | cell adhesion molecule 2                                            | NM_001145977 /// NM_17872   | 0.038                  | -1.98                      |
| 1453824_at                              | Ccdc76                | coiled-coil domain containing 76                                    | NM_030016                   | 0.011                  | -1.81                      |
| 1453330_at                              | Ccdc88c               | coiled-coil domain containing 88C                                   | NM_026681                   | 0.007                  | 1.62                       |
| 1419413_at                              | Ccl17                 | chemokine (C-C motif) ligand 17                                     | NM_011332                   | 0.001                  | 1.60                       |
| 1418070_at                              | Cdyl                  | chromodomain protein, Y chromosome-like                             | NM_001123386 /// NM_00988   | 0.012                  | -1.83                      |
| 1453482_at                              | Cflar                 | CASP8 and FADD-like apoptosis regulator                             | NM_009805 /// NM_207653     | 0.001                  | 1.77                       |
| 1446844_at                              | Chchd7                | coiled-coil-helix-coiled-coil-helix domain containing 7             | NM_181391                   | 0.011                  | -1.53                      |
| 1440158_x_at                            | Chchd7                | Coiled-coil-helix-coiled-coil-helix domain containing 7             | NM_181391                   | 0.019                  | -1.95                      |
| 1439342_at                              | Clpx                  | Caseinolytic peptidase X (E.coli)                                   | NM_001044389 /// NM_01180   | 0.040                  | -1.61                      |
| 1426684_at                              | Cnot6                 | CCR4-NOT transcription complex, subunit 6                           | NM_212484                   | 0.019                  | -1.55                      |
| 1438628_x_at                            | Cntn3                 | contactin 3                                                         | NM_008779                   | 0.009                  | -1.73                      |
| 1434411_at                              | Col12a1               | collagen, type XII, alpha 1                                         | NM_007730                   | 0.000                  | -4.22                      |

Supplemental Table 2.

Comparison of non-cerebellar gene expression differences between wild type and Gnb5 KO mice.

|              |                              |                                                                |                            |       |        |
|--------------|------------------------------|----------------------------------------------------------------|----------------------------|-------|--------|
| 1448734_at   | Cp                           | ceruloplasmin                                                  | NM_001042611 /// NM_00775  | 0.026 | -1.55  |
| 1435435_at   | Cttnbp2                      | cortactin binding protein 2                                    | NM_080285                  | 0.016 | -1.79  |
| 1447494_at   | D7Bwg0826e                   | DNA segment, Chr 7, Brigham & Women's Genetics 0826 exp ---    |                            | 0.047 | 1.51   |
| 1437256_at   | Dcun1d5                      | DCN1, defective in cullin neddylation 1, domain containing 5 ( | NM_029775                  | 0.006 | -1.61  |
| 1456000_at   | Ddx18                        | DEAD (Asp-Glu-Ala-Asp) box polypeptide 18                      | NM_025860                  | 0.044 | 1.54   |
| 1435132_at   | Disp1                        | dispatched homolog 1 (Drosophila)                              | NM_026866                  | 0.039 | 1.59   |
| 1417787_at   | Dkk1                         | dickkopf-like 1                                                | NM_015789                  | 0.017 | 1.65   |
| 1439376_x_at | Dmtf1                        | cyclin D binding myb-like transcription factor 1               | NM_001110327 /// NM_011801 | 0.029 | -1.54  |
| 1420165_s_at | Dnajc17                      | DnaJ (Hsp40) homolog, subfamily C, member 17                   | NM_139139                  | 0.023 | 1.51   |
| 1449373_at   | Dnajc3                       | DnaJ (Hsp40) homolog, subfamily C, member 3                    | NM_008929                  | 0.000 | -1.61  |
| 1419513_a_at | Ect2                         | ect2 oncogene                                                  | NM_001177625 /// NM_00117  | 0.039 | -1.62  |
| 1443682_at   | Eng                          | Endoglin                                                       | NM_001146348 /// NM_001141 | 0.012 | 1.55   |
| 1447900_x_at | Entpd4 /// LOC100048085      | ectonucleoside triphosphate diphosphohydrolase 4 /// similar t | NM_026174 /// XR_034152    | 0.018 | -1.68  |
| 1418294_at   | Epb4.114b                    | erythrocyte protein band 4.1-like 4b                           | NM_019427 /// XM_00147616  | 0.008 | 1.54   |
| 1435631_x_at | Exoc6                        | exocyst complex component 6                                    | NM_175353                  | 0.004 | 1.50   |
| 1438427_at   | Fam120b                      | family with sequence similarity 120, member B                  | NM_024203 /// NR_033586    | 0.002 | 1.71   |
| 1430685_at   | Fam131b                      | family with sequence similarity 131, member B                  | NM_001113327 /// NM_029521 | 0.027 | 1.55   |
| 1436685_at   | Fam181a                      | family with sequence similarity 181, member A                  | XM_619025 /// XM_909635    | 0.042 | 1.50   |
| 1448021_at   | Fam46c                       | family with sequence similarity 46, member C                   | NM_001142952 /// XR_001531 | 0.008 | -1.57  |
| 1436550_at   | Fbxo30                       | F-box protein 30                                               | NM_001168297 /// NM_02796  | 0.004 | -1.57  |
| 1418323_at   | Fem1b                        | feminization 1 homolog b (C. elegans)                          | NM_010193                  | 0.000 | 1.69   |
| 1416693_at   | Foxc2                        | forkhead box C2                                                | NM_013519                  | 0.015 | -1.62  |
| 1437388_at   | Fut10                        | fucosyltransferase 10                                          | NM_001012517 /// NM_13416  | 0.010 | 1.67   |
| 1440788_at   | Gas8                         | growth arrest specific 8                                       | NM_018855                  | 0.002 | -1.71  |
| 1448397_at   | Gjb6                         | gap junction protein, beta 6                                   | NM_001010937 /// NM_00812  | 0.010 | -1.50  |
| 1440945_at   | Glcci1                       | Glucocorticoid induced transcript 1                            | NM_133236                  | 0.020 | 1.63   |
| 1424825_a_at | Glycam1                      | glycosylation dependent cell adhesion molecule 1               | NM_008134                  | 0.001 | 1.61   |
| 1444616_x_at | Gm2380                       | predicted gene 2380                                            | XM_001473723 /// XR_033111 | 0.024 | -1.69  |
| 1428033_at   | Gm4979                       | predicted gene 4979                                            | NM_001142411 /// XM_001481 | 0.004 | -1.53  |
| 1457365_at   | Gm6860                       | Predicted gene 6860                                            | XM_900516                  | 0.002 | -2.07  |
| 1435217_at   | Gm7969                       | Predicted gene 7969                                            | XM_001473218 /// XM_982171 | 0.032 | -1.71  |
| 1422208_a_at | Gnb5                         | guanine nucleotide binding protein (G protein), beta 5         | NM_010313 /// NM_138719    | 0.000 | -49.11 |
| 1423142_a_at | Gtpbp4                       | GTP binding protein 4                                          | NM_027000                  | 0.048 | -1.56  |
| 1425138_at   | Guca1b                       | guanylate cyclase activator 1B                                 | NM_146079                  | 0.000 | 35.64  |
| 1425643_at   | Gypa                         | glycophorin A                                                  | NM_010369                  | 0.021 | -1.53  |
| 1427865_at   | Hbb-b2                       | hemoglobin, beta adult minor chain                             | NM_016956                  | 0.031 | -1.60  |
| 1439424_x_at | Herpud2                      | HERPUD family member 2                                         | NM_020586                  | 0.022 | -1.65  |
| 1434150_a_at | Higd1c /// Mettl7a1 /// Metl | HIG1 domain family, member 1C /// methyltransferase like 7A1   | NM_001002900 /// NM_02733  | 0.010 | -1.64  |
| 1428242_at   | Hmha1                        | histocompatibility (minor) HA-1                                | NM_001142701 /// NM_02752  | 0.002 | 1.51   |
| 1428224_at   | Hnrpd1                       | heterogeneous nuclear ribonucleoprotein D-like                 | NM_016690                  | 0.039 | -1.57  |
| 1430040_at   | Hspa12a                      | heat shock protein 12A                                         | NM_175199                  | 0.007 | 1.53   |
| 1457666_s_at | Ifi202b                      | interferon activated gene 202B                                 | NM_008327 /// NM_011940    | 0.045 | 1.73   |
| 1436831_at   | Iqub                         | IQ motif and ubiquitin domain containing                       | NM_172535                  | 0.011 | -1.51  |
| 1438247_at   | Kihl15                       | kelch-like 15 (Drosophila)                                     | NM_001039059 /// NM_00103  | 0.018 | 1.68   |
| 1426978_at   | Kihl2                        | kelch-like 2, Mayven (Drosophila)                              | NM_178633 /// XM_00147546  | 0.023 | -1.52  |
| 1449378_at   | Krt27                        | keratin 27                                                     | NM_010666                  | 0.026 | 1.51   |

Supplemental Table 2.

Comparison of non-cerebellar gene expression differences between wild type and Gnb5 KO mice.

|              |                        |                                                                    |                             |       |       |
|--------------|------------------------|--------------------------------------------------------------------|-----------------------------|-------|-------|
| 1435989_x_at | Krt8                   | keratin 8                                                          | NM_031170                   | 0.009 | 1.76  |
| 1426040_a_at | LOC100047199 /// Odf2  | similar to outer dense fiber of sperm tails 2 /// outer dense fibe | NM_001113213 /// NM_001111: | 0.025 | 1.70  |
| 1438931_s_at | LOC100047324 /// Sesn1 | similar to Sesn1 protein /// sestrin 1                             | NM_001013370 /// NM_00116   | 0.031 | -1.51 |
| 1416632_at   | LOC677317 /// Me1      | similar to NADP-dependent malic enzyme (NADP-ME) (Malic            | NM_008615 /// XM_00100468   | 0.022 | 1.63  |
| 1416121_at   | Lox                    | lysyl oxidase                                                      | NM_010728                   | 0.024 | -1.61 |
| 1440112_at   | Lrrtm3                 | leucine rich repeat transmembrane neuronal 3                       | NM_178678                   | 0.024 | -1.51 |
| 1455926_at   | Lsm6                   | LSM6 homolog, U6 small nuclear RNA associated (S. cerevisi         | NM_030145                   | 0.016 | 1.59  |
| 1428626_at   | Lysmd2                 | LysM, putative peptidoglycan-binding, domain containing 2          | NM_027309                   | 0.002 | 1.61  |
| 1453025_at   | MacroD2                | MACRO domain containing 2                                          | NM_001013802 /// NM_02838   | 0.002 | -1.52 |
| 1425252_a_at | Mad111                 | mitotic arrest deficient 1-like 1                                  | NM_010752                   | 0.006 | 1.59  |
| 1419677_at   | Masp1                  | mannan-binding lectin serine peptidase 1                           | NM_008555                   | 0.001 | 1.74  |
| 1437575_at   | Mcm9                   | minichromosome maintenance complex component 9                     | NM_027830                   | 0.020 | -1.59 |
| 1458343_x_at | Med6                   | mediator of RNA polymerase II transcription, subunit 6 homolo      | NM_027213                   | 0.044 | -1.63 |
| 1437058_at   | Megf6                  | multiple EGF-like-domains 6                                        | NM_001162977 /// XM_62014:  | 0.007 | 1.57  |
| 1447861_x_at | Meis2                  | Meis homeobox 2                                                    | NM_001136072 /// NM_00115:  | 0.039 | -1.50 |
| 1454858_x_at | Mettl7a1               | methyltransferase like 7A1                                         | NM_027334                   | 0.002 | -1.53 |
| 1433853_at   | Mib1                   | mindbomb homolog 1 (Drosophila)                                    | NM_144860                   | 0.001 | -1.63 |
| 1416759_at   | Mical1                 | microtubule associated monooxygenase, calponin and LIM dom         | NM_001164433 /// NM_13831   | 0.016 | 1.56  |
| 1434322_at   | Micall2                | MICAL-like 2                                                       | NM_174850                   | 0.044 | 1.74  |
| 1441546_at   | Mpp6                   | Membrane protein, palmitoylated 6 (MAGUK p55 subfamily m           | NM_001164733 /// NM_00116:  | 0.027 | -1.71 |
| 1436274_at   | Mrap2                  | melanocortin 2 receptor accessory protein 2                        | NM_001101482 /// NM_00117   | 0.002 | 1.53  |
| 1430798_x_at | Mrpl15                 | mitochondrial ribosomal protein L15                                | NM_001177658 /// NM_02530   | 0.002 | 2.06  |
| 1451536_at   | Mtfr1                  | mitochondrial fission regulator 1                                  | NM_026182                   | 0.002 | -1.87 |
| 1431739_at   | Mto1                   | mitochondrial translation optimization 1 homolog (S. cerevisiae)   | NM_026658                   | 0.002 | -1.50 |
| 1430729_at   | Myg1                   | melanocyte proliferating gene 1                                    | NM_021713                   | 0.048 | 1.55  |
| 1427768_s_at | Myl3                   | myosin, light polypeptide 3                                        | NM_010859                   | 0.035 | 1.51  |
| 1421334_x_at | Mynn                   | myoneurin                                                          | NM_030557                   | 0.002 | -1.54 |
| 1424933_at   | Myo5c                  | myosin VC                                                          | NM_001081322                | 0.018 | -1.51 |
| 1439708_at   | Myom3                  | myomesin family, member 3                                          | NM_001085509 /// XM_14409   | 0.045 | 1.63  |
| 1446718_at   | Nfkbib                 | nuclear factor of kappa light polypeptide gene enhancer in B-c     | NM_010908                   | 0.001 | 1.57  |
| 1436136_at   | Noc2l                  | nucleolar complex associated 2 homolog (S. cerevisiae)             | NM_021303                   | 0.000 | 1.57  |
| 1431597_a_at | Nrip3                  | nuclear receptor interacting protein 3                             | NM_020610                   | 0.048 | -1.54 |
| 1458492_x_at | Ntm                    | neurotrimin                                                        | NM_172290                   | 0.001 | -1.57 |
| 1430341_at   | Nudt5                  | nudix (nucleoside diphosphate linked moiety X)-type motif 5        | NM_016918                   | 0.010 | -1.58 |
| 1435216_a_at | Odf2                   | outer dense fiber of sperm tails 2                                 | NM_001113213 /// NM_00111:  | 0.030 | 1.66  |
| 1419663_at   | Ogn                    | osteoglycin                                                        | NM_008760                   | 0.004 | -1.61 |
| 1418745_at   | Omd                    | osteomodulin                                                       | NM_012050                   | 0.005 | -1.61 |
| 1444029_at   | Parp11                 | poly (ADP-ribose) polymerase family, member 11                     | NM_181402                   | 0.003 | 2.07  |
| 1440203_at   | Pcgf3                  | polycomb group ring finger 3                                       | NM_172716                   | 0.028 | 1.59  |
| 1443869_at   | Pde12                  | phosphodiesterase 12                                               | NM_178668                   | 0.018 | -1.69 |
| 1427213_at   | Pfkfb1                 | 6-phosphofructo-2-kinase/fructose-2,6-biphosphatase 1              | NM_008824                   | 0.023 | 1.60  |
| 1437594_x_at | Pigt                   | phosphatidylinositol glycan anchor biosynthesis, class T           | NM_133779                   | 0.024 | -1.57 |
| 1454838_s_at | Pkdcc                  | protein kinase domain containing, cytoplasmic                      | NM_134117 /// XM_00148048:  | 0.041 | -1.59 |
| 1436851_at   | Pkn1 /// Ptger1        | protein kinase N1 /// prostaglandin E receptor 1 (subtype EP1)     | NM_013641 /// NM_177262     | 0.048 | 1.57  |
| 1439840_at   | Polb                   | polymerase (DNA directed), beta                                    | NM_011130                   | 0.000 | -1.73 |
| 1426839_at   | Pold3                  | polymerase (DNA-directed), delta 3, accessory subunit              | NM_133692                   | 0.005 | 1.51  |

Supplemental Table 2.

Comparison of non-cerebellar gene expression differences between wild type and Gnb5 KO mice.

|              |          |                                                                                 |                             |       |       |
|--------------|----------|---------------------------------------------------------------------------------|-----------------------------|-------|-------|
| 1428923_at   | Ppp1r3g  | protein phosphatase 1, regulatory (inhibitor) subunit 3G                        | NM_029628 /// XM_127272 /// | 0.014 | -1.60 |
| 1443144_at   | Prkcb    | protein kinase C, beta                                                          | NM_008855                   | 0.000 | 1.58  |
| 1437671_x_at | Prss23   | protease, serine, 23                                                            | NM_029614                   | 0.003 | -1.96 |
| 1445445_s_at | Ptger1   | prostaglandin E receptor 1 (subtype EP1)                                        | NM_013641                   | 0.041 | 1.59  |
| 1438562_a_at | Ptpn2    | protein tyrosine phosphatase, non-receptor type 2                               | NM_001127177 /// NM_00897   | 0.048 | -1.66 |
| 1424456_at   | Pvrl2    | poliovirus receptor-related 2                                                   | NM_001159724 /// NM_00899   | 0.024 | 1.51  |
| 1457257_x_at | Pvrl3    | poliovirus receptor-related 3                                                   | NM_021495 /// NM_021496 /// | 0.003 | -1.60 |
| 1417073_a_at | Qk       | quaking                                                                         | NM_001159516 /// NM_001151  | 0.001 | -1.53 |
| 1429169_at   | Rbm3     | RNA binding motif protein 3                                                     | NM_001166409 /// NM_001161  | 0.000 | -4.00 |
| 1438021_at   | Rbm47    | RNA binding motif protein 47                                                    | NM_001127382 /// NM_13906   | 0.043 | -1.57 |
| 1416355_at   | Rbmx     | RNA binding motif protein, X chromosome                                         | NM_001166623 /// NM_011251  | 0.004 | -1.65 |
| 1433976_at   | Reep3    | Receptor accessory protein 3                                                    | NM_178606                   | 0.007 | -1.57 |
| 1430128_a_at | Reep6    | receptor accessory protein 6                                                    | NM_139292                   | 0.048 | 1.60  |
| 1455265_a_at | Rgs16    | regulator of G-protein signaling 16                                             | NM_011267                   | 0.023 | -1.81 |
| 1435284_at   | Rtn4     | reticulon 4                                                                     | NM_024226 /// NM_194051 /// | 0.002 | -1.64 |
| 1440846_at   | Scai     | suppressor of cancer cell invasion                                              | NM_178778                   | 0.000 | -1.51 |
| 1437307_at   | Senp8    | SUMO/sentrin specific peptidase 8                                               | NM_001172068 /// NM_001171  | 0.024 | -1.58 |
| 1417815_a_at | Serinc3  | serine incorporator 3                                                           | NM_012032                   | 0.009 | -1.53 |
| 1436871_at   | Sfrs7    | splicing factor, arginine/serine-rich 7                                         | NM_146083                   | 0.003 | 1.83  |
| 1437033_a_at | Skp2     | S-phase kinase-associated protein 2 (p45)                                       | NM_013787 /// NM_145468     | 0.028 | -1.55 |
| 1436989_s_at | Slc12a6  | solute carrier family 12, member 6                                              | NM_133648 /// NM_133649     | 0.001 | -1.68 |
| 1434188_at   | Slc16a12 | solute carrier family 16 (monocarboxylic acid transporters), member 12          | NM_172838                   | 0.002 | -1.91 |
| 1443749_x_at | Slc1a3   | solute carrier family 1 (glial high affinity glutamate transporter), member 3   | NM_148938                   | 0.019 | -1.59 |
| 1455506_at   | Slc25a34 | solute carrier family 25, member 34                                             | NM_001013780                | 0.034 | 1.71  |
| 1447783_x_at | Slc25a39 | solute carrier family 25, member 39                                             | NM_026542                   | 0.024 | -1.60 |
| 1447893_x_at | Slc39a6  | solute carrier family 39 (metal ion transporter), member 6                      | NM_139143                   | 0.006 | -1.59 |
| 1434502_x_at | Slc4a1   | solute carrier family 4 (anion exchanger), member 1                             | NM_011403                   | 0.015 | -1.90 |
| 1447186_at   | Slc6a16  | solute carrier family 6, member 16                                              | XM_355900 /// XM_914689     | 0.046 | 1.50  |
| 1443536_at   | Slc7a11  | solute carrier family 7 (cationic amino acid transporter, y+ system), member 11 | NM_011990                   | 0.013 | -1.71 |
| 1437870_at   | Slco4c1  | solute carrier organic anion transporter family, member 4C1                     | NM_172658                   | 0.014 | -1.68 |
| 1425977_a_at | Slk      | STE20-like kinase (yeast)                                                       | NM_001164639 /// NM_00928   | 0.008 | -1.52 |
| 1445720_at   | Sltm     | SAFB-like, transcription modulator                                              | NM_025690 /// NM_026337     | 0.012 | -1.54 |
| 1449254_at   | Spp1     | secreted phosphoprotein 1                                                       | NM_009263                   | 0.000 | -1.51 |
| 1437638_at   | Srrm2    | serine/arginine repetitive matrix 2                                             | NM_175229                   | 0.035 | -1.58 |
| 1436257_at   | Ss18     | synovial sarcoma translocation, Chromosome 18                                   | NM_001161369 /// NM_001161  | 0.041 | -1.72 |
| 1452617_at   | Ssbp1    | single-stranded DNA binding protein 1                                           | NM_028358 /// NM_212468     | 0.028 | -1.53 |
| 1443554_at   | Ssbp3    | Single-stranded DNA binding protein 3                                           | NM_023672 /// NM_198438     | 0.008 | 1.57  |
| 1442452_at   | Stradb   | STE20-related kinase adaptor beta                                               | NM_172656                   | 0.032 | -1.52 |
| 1435058_x_at | Stxbp3a  | syntaxin binding protein 3A                                                     | NM_011504                   | 0.048 | -1.69 |
| 1441906_x_at | Syap1    | synapse associated protein 1                                                    | NM_025932                   | 0.017 | -1.71 |
| 1430133_at   | Tbc1d8b  | TBC1 domain family, member 8B                                                   | NM_001081499                | 0.007 | -1.55 |
| 1456033_at   | Tbx4     | T-box 4                                                                         | NM_011536 /// NM_172798     | 0.011 | 1.61  |
| 1439619_at   | Tcf12    | transcription factor 12                                                         | NM_011544                   | 0.034 | -1.60 |
| 1421909_at   | Tcf20    | transcription factor 20                                                         | NM_001114140 /// NM_013831  | 0.039 | 1.53  |
| 1426639_a_at | Tcf7l2   | transcription factor 7-like 2, T-cell specific, HMG-box domain                  | NM_001142918 /// NM_001141  | 0.025 | 1.58  |
| 1449640_at   | Tlr7     | toll-like receptor 7                                                            | NM_133211                   | 0.011 | 1.68  |

Supplemental Table 2.

Comparison of non-cerebellar gene expression differences between wild type and Gnb5 KO mice.

|              |          |                                                                      |                            |       |       |
|--------------|----------|----------------------------------------------------------------------|----------------------------|-------|-------|
| 1425079_at   | Tm6sf2   | transmembrane 6 superfamily member 2                                 | NM_181540                  | 0.019 | -1.65 |
| 1441890_x_at | Tmeff1   | transmembrane protein with EGF-like and two follistatin-like domains | NM_021436                  | 0.024 | -1.66 |
| 1443619_at   | Tmem30a  | transmembrane protein 30A                                            | NM_133718                  | 0.000 | -5.72 |
| 1433735_a_at | Tmem64   | transmembrane protein 64                                             | NM_181401                  | 0.029 | -1.66 |
| 1423088_at   | Tmod3    | tropomodulin 3                                                       | NM_016963                  | 0.000 | -1.80 |
| 1436826_at   | Tmtc3    | transmembrane and tetratricopeptide repeat containing 3              | NM_001033332 /// NM_001111 | 0.008 | -1.52 |
| 1426095_a_at | Tnfrsf22 | tumor necrosis factor receptor superfamily, member 22                | NM_023680                  | 0.025 | 1.57  |
| 1420351_at   | Tnfrsf4  | tumor necrosis factor receptor superfamily, member 4                 | NM_011659                  | 0.037 | 1.76  |
| 1418726_a_at | Tnnt2    | troponin T2, cardiac                                                 | NM_001130174 /// NM_001131 | 0.010 | 1.52  |
| 1423176_at   | Tob1     | transducer of ErbB-2.1                                               | NM_009427                  | 0.012 | -1.69 |
| 1448667_x_at | Tob2     | transducer of ERBB2, 2                                               | NM_020507                  | 0.012 | -1.59 |
| 1423310_at   | Tpbp     | trophoblast glycoprotein                                             | NM_001164792 /// NM_011621 | 0.040 | 1.89  |
| 1456089_at   | Trim23   | tripartite motif-containing 23                                       | NM_030731                  | 0.019 | -1.68 |
| 1436393_a_at | Trim37   | tripartite motif-containing 37                                       | NM_197987                  | 0.003 | 1.64  |
| 1440268_at   | Trim41   | tripartite motif-containing 41                                       | NM_145377 /// XM_00147546  | 0.023 | -1.60 |
| 1460375_at   | Trmt112  | tRNA methyltransferase 11-2 homolog (S. cerevisiae)                  | NM_001166370 /// NM_026301 | 0.000 | 1.77  |
| 1438542_at   | Trp53    | Transformation related protein 53                                    | NM_001127233 /// NM_011641 | 0.001 | 1.56  |
| 1420772_a_at | Tsc22d3  | TSC22 domain family, member 3                                        | NM_001077364 /// NM_010281 | 0.026 | -1.51 |
| 1455853_x_at | Tspan31  | tetraspanin 31                                                       | NM_025982                  | 0.022 | 1.53  |
| 1453392_at   | Ttc39b   | tetratricopeptide repeat domain 39B                                  | NM_027238                  | 0.008 | 1.53  |
| 1452054_at   | Ube2w    | ubiquitin-conjugating enzyme E2W (putative)                          | NM_025773                  | 0.035 | -1.51 |
| 1436882_at   | Ubl5     | ubiquitin-like 5                                                     | NM_025401                  | 0.013 | 1.53  |
| 1436628_at   | Ulk4     | unc-51-like kinase 4 (C. elegans)                                    | NM_177589 /// XM_00147956  | 0.005 | 1.63  |
| 1452613_at   | Uqcrcq   | ubiquinol-cytochrome c reductase, complex III subunit VII            | NM_025352                  | 0.010 | 1.51  |
| 1437293_x_at | Ust      | uronyl-2-sulfotransferase                                            | NM_177387                  | 0.013 | -1.56 |
| 1453162_at   | Utp11    | UTP11-like, U3 small nucleolar ribonucleoprotein, (yeast)            | NM_026031                  | 0.006 | -1.54 |
| 1420909_at   | Vegfa    | vascular endothelial growth factor A                                 | NM_001025250 /// NM_001021 | 0.044 | -1.52 |
| 1455299_at   | Vgll3    | vestigial like 3 (Drosophila)                                        | NM_028572 /// XM_00148040  | 0.005 | -1.58 |
| 1428811_at   | Wfikkn2  | WAP, follistatin/kazal, immunoglobulin, kunitz and netrin domain     | NM_181819                  | 0.027 | 1.67  |
| 1421054_at   | Xpo4     | exportin 4                                                           | NM_020506                  | 0.047 | 1.58  |
| 1434298_at   | Zeb2     | zinc finger E-box binding homeobox 2                                 | NM_015753                  | 0.028 | -1.81 |
| 1425010_at   | Zfp119   | zinc finger protein 119                                              | NM_144546                  | 0.006 | -1.50 |
| 1454885_at   | Zfp141   | zinc finger protein 141                                              | XM_485924 /// XM_916641    | 0.009 | -1.50 |
| 1460085_at   | Zfp281   | Zinc finger protein 281                                              | NM_001160251 /// NM_177641 | 0.005 | -1.52 |
| 1444352_at   | Zfp287   | zinc finger protein 287                                              | NM_133208                  | 0.007 | -1.71 |
| 1444528_at   | Zfp316   | zinc finger protein 316                                              | NM_017467                  | 0.001 | 1.65  |
| 1455638_at   | Zfp319   | zinc finger protein 319                                              | NM_024467                  | 0.006 | -1.74 |
| 1458003_at   | Zfp398   | zinc finger protein 398                                              | NM_027477 /// NM_173034    | 0.020 | 1.72  |
| 1450929_at   | Zfp57    | zinc finger protein 57                                               | NM_001013745 /// NM_001161 | 0.042 | 1.56  |
| 1419787_a_at | Zfp628   | zinc finger protein 628                                              | NM_170759                  | 0.008 | 1.60  |
| 1438140_a_at | Zfp64    | zinc finger protein 64                                               | NM_009564                  | 0.000 | 1.52  |
| 1435916_at   | Zfp84    | zinc finger protein 84                                               | NM_023750 /// XM_00148014  | 0.005 | -1.54 |
| 1443640_at   | Zfp882   | zinc finger protein 882                                              | NM_001166645 /// XM_904231 | 0.033 | -1.57 |
| 1438737_at   | Zic3     | zinc finger protein of the cerebellum 3                              | NM_009575                  | 0.014 | -1.59 |
| 1452610_at   | Zkscan14 | zinc finger with KRAB and SCAN domains 14                            | NM_023322                  | 0.004 | 1.59  |
| 1437892_at   | Zkscan3  | zinc finger with KRAB and SCAN domains 3                             | NM_001145778 /// NM_023681 | 0.040 | -1.66 |

Supplemental Table 2.

Comparison of non-cerebellar gene expression differences between wild type and Gnb5 KO mice.

|            |         |                             |                           |       |       |
|------------|---------|-----------------------------|---------------------------|-------|-------|
| 1431259_at | Zscan29 | zinc finger SCAN domains 29 | NM_178889 /// XM_00148055 | 0.016 | -1.70 |
| 1417240_at | Zyx     | zyxin                       | NM_011777                 | 0.010 | 1.63  |



Supplemental Table 3.  
Gene expression differences in wild type and Gnb5 KO mice common to both cerebellar and non-cerebellar regions.

| Affymetrix<br>Gene Chip<br>Probe set ID | Gene<br>Symbol    | Gene Title                                                | RefSeq Transcript ID      | p-value<br>(KO vs. WT)<br>Cerebellar | Fold-Change<br>(KO vs. WT)<br>Cerebellar | p-value<br>(KO vs. WT)<br>Non-cerebellar | Fold-Change<br>(KO vs. WT)<br>Non-cerebellar |
|-----------------------------------------|-------------------|-----------------------------------------------------------|---------------------------|--------------------------------------|------------------------------------------|------------------------------------------|----------------------------------------------|
| 1449895_at                              | Acr               | acrosin prepropeptide                                     | NM_013455                 | 0.014                                | 1.78                                     | 0.003                                    | 1.61                                         |
| 1458613_at                              | Arrdc1            | arrestin domain containing 1                              | NM_001162485 /// NM_1784C | 0.020                                | 1.53                                     | 0.049                                    | 1.72                                         |
| 1424759_at                              | Arrdc4            | arrestin domain containing 4                              | NM_001042592 /// NM_02554 | 0.005                                | 2.21                                     | 0.004                                    | 2.22                                         |
| 1455851_at                              | Bmp5              | bone morphogenetic protein 5                              | NM_007555                 | 0.010                                | -1.66                                    | 0.001                                    | -1.86                                        |
| 1459610_at                              | C87490            | expressed sequence C87490                                 | ---                       | 0.021                                | 1.59                                     | 0.002                                    | 1.69                                         |
| 1453482_at                              | Cflar             | CASP8 and FADD-like apoptosis regulator                   | NM_009805 /// NM_207653   | 0.008                                | 2.35                                     | 0.001                                    | 1.77                                         |
| 1426684_at                              | Cnot6             | CCR4-NOT transcription complex, subunit 6                 | NM_212484                 | 0.026                                | -1.59                                    | 0.019                                    | -1.55                                        |
| 1434411_at                              | Col12a1           | collagen, type XII, alpha 1                               | NM_007730                 | 0.001                                | -4.27                                    | 0.000                                    | -4.22                                        |
| 1435132_at                              | Disp1             | dispatched homolog 1 (Drosophila)                         | NM_026866                 | 0.027                                | 1.84                                     | 0.039                                    | 1.59                                         |
| 1418294_at                              | Epb4.114b         | erythrocyte protein band 4.1-like 4b                      | NM_019427 /// XM_0014761E | 0.006                                | 2.00                                     | 0.008                                    | 1.54                                         |
| 1438427_at                              | Fam120b           | family with sequence similarity 120, member B             | NM_024203 /// NR_033586   | 0.009                                | 1.89                                     | 0.002                                    | 1.71                                         |
| 1448021_at                              | Fam46c            | family with sequence similarity 46, member C              | NM_001142952 /// XR_00153 | 0.005                                | -4.15                                    | 0.008                                    | -1.57                                        |
| 1436550_at                              | Fbxo30            | F-box protein 30                                          | NM_001168297 /// NM_0279E | 0.014                                | -1.88                                    | 0.004                                    | -1.57                                        |
| 1418323_at                              | Fem1b             | feminization 1 homolog b (C. elegans)                     | NM_010193                 | 0.012                                | 2.02                                     | 0.000                                    | 1.69                                         |
| 1416693_at                              | Foxc2             | forkhead box C2                                           | NM_013519                 | 0.001                                | -1.58                                    | 0.015                                    | -1.62                                        |
| 1422208_a_at                            | Gnb5              | guanine nucleotide binding protein (G protein), beta 5    | NM_010313 /// NM_138719   | 0.000                                | -40.76                                   | 0.000                                    | -49.11                                       |
| 1425138_at                              | Guca1b            | guanylate cyclase activator 1B                            | NM_146079                 | 0.000                                | 27.94                                    | 0.000                                    | 35.64                                        |
| 1427865_at                              | Hbb-b2            | hemoglobin, beta adult minor chain                        | NM_016956                 | 0.010                                | -1.51                                    | 0.031                                    | -1.60                                        |
| 1438247_at                              | Klhl15            | kelch-like 15 (Drosophila)                                | NM_001039059 /// NM_0010C | 0.035                                | 1.59                                     | 0.018                                    | 1.68                                         |
| 1416632_at                              | LOC677317 /// Me1 | similar to NADP-dependent malic enzyme (NADP-ME) (Ma      | NM_008615 /// XM_0010046E | 0.016                                | 1.54                                     | 0.022                                    | 1.63                                         |
| 1428626_at                              | Lysmd2            | LysM, putative peptidoglycan-binding, domain containing 2 | NM_027309                 | 0.005                                | 1.69                                     | 0.002                                    | 1.61                                         |
| 1434322_at                              | Micall2           | MICAL-like 2                                              | NM_174850                 | 0.024                                | 1.70                                     | 0.044                                    | 1.74                                         |
| 1430798_x_at                            | Mrpl15            | mitochondrial ribosomal protein L15                       | NM_001177658 /// NM_0253C | 0.016                                | 2.22                                     | 0.002                                    | 2.06                                         |
| 1419662_at                              | Ogn               | osteoglycin                                               | NM_008760                 | 0.030                                | -1.51                                    | 0.017                                    | -1.65                                        |
| 1444029_at                              | Parp11            | poly (ADP-ribose) polymerase family, member 11            | NM_181402                 | 0.019                                | 2.23                                     | 0.003                                    | 2.07                                         |
| 1439840_at                              | Polb              | polymerase (DNA directed), beta                           | NM_011130                 | 0.006                                | -1.69                                    | 0.000                                    | -1.73                                        |
| 1426839_at                              | Pold3             | polymerase (DNA-directed), delta 3, accessory subunit     | NM_133692                 | 0.029                                | 1.65                                     | 0.005                                    | 1.51                                         |
| 1429169_at                              | Rbm3              | RNA binding motif protein 3                               | NM_001166409 /// NM_00116 | 0.017                                | -4.77                                    | 0.000                                    | -4.00                                        |
| 1416355_at                              | Rbmx              | RNA binding motif protein, X chromosome                   | NM_001166623 /// NM_01125 | 0.009                                | -1.64                                    | 0.004                                    | -1.65                                        |
| 1436871_at                              | Sfrs7             | splicing factor, arginine/serine-rich 7                   | NM_146083                 | 0.006                                | 1.79                                     | 0.003                                    | 1.83                                         |
| 1434502_x_at                            | Slc4a1            | solute carrier family 4 (anion exchanger), member 1       | NM_011403                 | 0.021                                | -3.72                                    | 0.015                                    | -1.90                                        |
| 1436257_at                              | Ss18              | synovial sarcoma translocation, Chromosome 18             | NM_001161369 /// NM_00116 | 0.044                                | -1.55                                    | 0.041                                    | -1.72                                        |
| 1452617_at                              | Ssbp1             | single-stranded DNA binding protein 1                     | NM_028358 /// NM_212468   | 0.036                                | -1.65                                    | 0.028                                    | -1.53                                        |
| 1425079_at                              | Tm6sf2            | transmembrane 6 superfamily member 2                      | NM_181540                 | 0.004                                | -1.77                                    | 0.019                                    | -1.65                                        |
| 1443619_at                              | Tmem30a           | transmembrane protein 30A                                 | NM_133718                 | 0.001                                | -8.96                                    | 0.000                                    | -5.72                                        |
| 1423088_at                              | Tmod3             | tropomodulin 3                                            | NM_016963                 | 0.002                                | -2.03                                    | 0.000                                    | -1.80                                        |
| 1438542_at                              | Trp53             | Transformation related protein 53                         | NM_001127233 /// NM_01164 | 0.028                                | 1.83                                     | 0.001                                    | 1.56                                         |
| 1425010_at                              | Zfp119            | zinc finger protein 119                                   | NM_144546                 | 0.032                                | -1.64                                    | 0.006                                    | -1.50                                        |
| 1452610_at                              | Zkscan14          | zinc finger with KRAB and SCAN domains 14                 | NM_023322                 | 0.013                                | 1.67                                     | 0.004                                    | 1.59                                         |
